# Supplementary material for: The Antitumor Effect of the DNA Polymerase Alpha Inhibitor ST1926 in Glioblastoma: A Proteomics Approach
Source: MDPI journal article supplement (doi:10.3390/ijms241814069), 2023-09-14
Supplement: s1 [file s1]

### Supplementary Tables:

**Table S1.** List of altered proteins in U251 cells versus Control, after treatment with 0.5  $\mu$ M ST1926 for 2 hours. A total of 77 proteins with significant changes (30 downregulated (↓) and 47 upregulated (↑)) were identified in U251 cells with  $p < 0.05$ .

| Protein IDs | Protein Names                                                     | Gene IDs        | <i>p</i> -value | Fold Change |
|-------------|-------------------------------------------------------------------|-----------------|-----------------|-------------|
| Q14980      | Nuclear mitotic apparatus protein 1                               | NUMA1           | 0.0007          | 0.99 ↓      |
| Q99714      | 3-hydroxyacyl-CoA dehydrogenase type-2 (HCD2)                     | HSD17B10        | 0.0008          | 0.98 ↓      |
| P00387      | NADH-cytochrome b5 reductase 3                                    | CYB5R3          | 0.0009          | 0.98 ↓      |
| Q9C0H2      | Protein tweety homolog 3                                          | TTYH3           | 0.002           | 0.97 ↓      |
| P35659      | Protein DEK                                                       | DEK             | 0.005           | 0.98 ↓      |
| P07237      | Protein disulfide-isomerase                                       | PDI             | 0.005           | 0.99 ↓      |
| P07954      | Fumarate hydratase                                                | FH              | 0.006           | 0.97 ↓      |
| O14979      | Heterogeneous nuclear ribonucleoprotein D-like                    | HNRNPDL         | 0.007           | 0.99 ↓      |
| Q9Y277      | Voltage-dependent anion-selective channel protein 3               | VDAC-3          | 0.008           | 0.98 ↓      |
| O00159      | Unconventional myosin-Ic                                          | MYO1C           | 0.01            | 0.98 ↓      |
| P50454      | Serpin family H member 1                                          | SERPINH1        | 0.01            | 0.98 ↓      |
| Q9Y2W1      | Thyroid hormone receptor-associated protein 3                     | THRAP3          | 0.01            | 0.98 ↓      |
| Q13084      | 39S ribosomal protein L28                                         | MRP-L28         | 0.02            | 0.98 ↓      |
| P61026      | Ras-related protein Rab-10                                        | RAB10           | 0.02            | 0.99 ↓      |
| Q14257      | Reticulocalbin-2/ (E6-binding protein) (E6BP)                     | RCN2            | 0.02            | 0.99 ↓      |
| P26599      | Polypyrimidine tract-binding protein 1                            | PTBP1           | 0.02            | 0.99 ↓      |
| Q13838      | Spliceosome RNA helicase DDX39B                                   | DDX39B          | 0.02            | 0.98 ↓      |
| Q86UP2      | Kinectin                                                          | KTN1            | 0.03            | 0.99 ↓      |
| Q9UH99      | SUN domain-containing protein 2                                   | SUN2            | 0.03            | 0.98 ↓      |
| P27797      | Calreticulin (CRP55) (Calregulin)                                 | CALR            | 0.03            | 0.99 ↓      |
| Q9H857      | 5'-nucleotidase domain-containing protein 2                       | NT5DC2          | 0.03            | 0.97 ↓      |
| Q9Y4L1      | Hypoxia up-regulated protein 1                                    | HYOU1           | 0.03            | 0.99 ↓      |
| P01111      | GTPase NRas                                                       | NRAS            | 0.03            | 0.97 ↓      |
| P08621      | U1 small nuclear ribonucleoprotein 70 kDa                         | SNRNP70         | 0.04            | 0.98 ↓      |
| P11387      | DNA topoisomerase 1                                               | TOP1            | 0.05            | 0.97 ↓      |
| P12236      | Solute carrier family 25 member 6                                 | SLC25A6         | 0.04            | 0.98 ↓      |
| P11166      | Solute carrier family 2, facilitated glucose transporter member 1 | SLC2A1<br>GLUT1 | 0.04            | 0.94 ↓      |
| Q12906      | Interleukin enhancer-binding factor 3                             | ILF3            | 0.04            | 0.99 ↓      |
| Q13185      | Chromobox protein homolog 3                                       | CBX3            | 0.04            | 0.98 ↓      |
| Q9BRJ6      | Uncharacterized protein C7orf50                                   | C7orf50         | 0.04            | 0.99 ↓      |

| <b>Protein IDs</b> | <b>Protein Names</b>                                         | <b>Gene IDs</b>      | <b><i>p</i>-value</b> | <b>Fold Change</b> |
|--------------------|--------------------------------------------------------------|----------------------|-----------------------|--------------------|
| O00299             | Chloride intracellular channel protein 1                     | CLIC1                | 0.02                  | 1.02 ↑             |
| Q9BZQ8             | Protein Niban 1 (Protein FAM129A)                            | NIBAN1<br>FAM129A    | 0.05                  | 1.02 ↑             |
| Q9BVA1             | Tubulin beta-2B chain                                        | TUBB2B               | 0.04                  | 1.03 ↑             |
| Q13620             | Cullin-4B (CUL-4B)                                           | CUL4B                | 0.04                  | 1.01 ↑             |
| P15151             | Poliovirus receptor                                          | PVR/ PVS             | 0.04                  | 1.03 ↑             |
| P27694             | Replication protein A 70 kDa DNA-binding subunit             | RPA1<br>RPA70        | 0.04                  | 1.02 ↑             |
| P49327             | Fatty acid synthase                                          | FASN/ FAS            | 0.04                  | 1.01 ↑             |
| P06737             | Glycogen phosphorylase                                       | PYGL                 | 0.04                  | 1.02 ↑             |
| P32119             | Peroxiredoxin-2                                              | PRDX2                | 0.04                  | 1.01 ↑             |
| Q9BUF5             | Tubulin beta-6 chain                                         | TUBB6                | 0.04                  | 1.02 ↑             |
| P41250             | Glycine--tRNA ligase                                         | GARS1<br>GARS        | 0.04                  | 1.01 ↑             |
| P60174             | Triosephosphate isomerase (TIM)                              | TPI1/ TPI            | 0.04                  | 1.02 ↑             |
| Q8TAT6             | Nuclear protein localization protein 4 homolog               | NPLOC4               | 0.04                  | 1.03 ↑             |
| P14618             | Pyruvate kinase PKM                                          | PKM/ OIP3            | 0.03                  | 1.01 ↑             |
| Q9NTK5             | Obg-like ATPase 1                                            | OLA1                 | 0.03                  | 1.01 ↑             |
| Q15185             | Prostaglandin E synthase 3                                   | PTGES3               | 0.03                  | 1.01 ↑             |
| P30086             | Phosphatidylethanolamine-binding protein 1 (PEBP-1)          | PEBP1/<br>PBP/ PEBP  | 0.03                  | 1.03 ↑             |
| Q9Y2J8             | Protein-arginine deiminase type-2                            | PADI2                | 0.03                  | 1.02 ↑             |
| P30085             | UMP-CMP kinase                                               | CMPK1<br>CMK<br>CMPK | 0.03                  | 1.03 ↑             |
| Q16881             | Thioredoxin Reductase 1                                      | TXNRD1               | 0.03                  | 1.03 ↑             |
| O43175             | D-3-phosphoglycerate dehydrogenase (3-PGDH)                  | PHGDH<br>PGDH3       | 0.03                  | 1.02 ↑             |
| Q9NZL4             | Hsp70-binding protein 1 (HspBP1)                             | HSPBP1               | 0.03                  | 1.01 ↑             |
| P23526             | Adenosylhomocysteinase (AdoHcyase)                           | AHCY                 | 0.02                  | 1.02 ↑             |
| P31689             | DnaJ homolog subfamily A member 1 (DnaJ1)                    | DNAJA1<br>DNAJ2      | 0.02                  | 1.01 ↑             |
| P52292             | Importin subunit alpha-1                                     | KPNA2                | 0.02                  | 1.02 ↑             |
| P07195             | L-lactate dehydrogenase B chain (LDH-B)                      | LDHB                 | 0.02                  | 1.02 ↑             |
| P52565             | Rho GDP-dissociation inhibitor 1 (Rho GDI 1)                 | ARHGDIA              | 0.02                  | 1.03 ↑             |
| P06733             | Alpha-enolase                                                | ENO1                 | 0.02                  | 1.02 ↑             |
| Q15102             | Platelet-activating factor acetylhydrolase IB subunit alpha1 | PAFAH1B3             | 0.02                  | 1.02 ↑             |
| Q14008             | Cytoskeleton-associated protein 5                            | CKAP5                | 0.02                  | 1.02 ↑             |

| <b>Protein IDs</b> | <b>Protein Names</b>                                                      | <b>Gene IDs</b>          | <b><i>p</i>-value</b> | <b>Fold Change</b> |
|--------------------|---------------------------------------------------------------------------|--------------------------|-----------------------|--------------------|
| P00492             | Hypoxanthine-guanine phosphoribosyltransferase (HGPRT)                    | HPRT1<br>HPRT            | 0.02                  | 1.01 ↑             |
| Q16658             | Fascin                                                                    | FSCN1                    | 0.01                  | 1.02 ↑             |
| P60866             | 40S ribosomal protein S20                                                 | RPS20                    | 0.01                  | 1.03 ↑             |
| O60884             | DnaJ homolog subfamily A member 2                                         | DNAJA2                   | 0.01                  | 1.01 ↑             |
| Q9BRA2             | Thioredoxin domain-containing protein 17                                  | TXNDC17                  | 0.01                  | 1.04 ↑             |
| P15559             | NAD(P)H dehydrogenase [quinone] 1                                         | NQO1                     | 0.01                  | 1.04 ↑             |
| O75083             | WD repeat-containing protein 1                                            | WDR1                     | 0.01                  | 1.03 ↑             |
| Q99497             | Parkinson disease protein 7                                               | PARK7                    | 0.01                  | 1.02 ↑             |
| Q9H223             | EH domain-containing protein 4                                            | EHD4                     | 0.01                  | 1.02 ↑             |
| P31150             | Rab GDP dissociation inhibitor alpha (Rab GDI alpha)                      | GDI1<br>GDIL             | 0.01                  | 1.03 ↑             |
| P06744             | Glucose-6-phosphate isomerase                                             | GPI                      | 0.006                 | 1.01 ↑             |
| P04083             | Annexin A1 (Annexin I)                                                    | ANXA1                    | 0.006                 | 1.02 ↑             |
| P63104             | 14-3-3 protein zeta/delta (Protein kinase C inhibitor protein 1) (KCIP-1) | YWHAZ                    | 0.006                 | 1.02 ↑             |
| O60664             | Perilipin-3                                                               | PLIN3                    | 0.003                 | 1.03 ↑             |
| P11586             | C-1-tetrahydrofolate synthase, Methylenetetrahydrofolate dehydrogenase    | MTHFD1<br>MTHFC<br>MTHFD | 0.003                 | 1.02 ↑             |
| P08758             | Annexin A5 (Annexin V)                                                    | ANXA5                    | 0.0008                | 1.02 ↑             |
| Q99613             | Eukaryotic translation initiation factor 3 subunit C (eIF3c)              | EIF3C<br>EIF3S8          | 0.0005                | 1.02 ↑             |

**Table S2.** List of altered proteins in U251 cells versus Control, after treatment with 0.5  $\mu$ M ST1926 for 24 hours. A total of 197 proteins with significant changes (71 downregulated (↓) and 126 upregulated (↑)) were identified in U251 cells with  $p < 0.05$ .

| Protein IDs | Protein Names                                                     | Gene IDs           | <i>p</i> -value | Fold Change |
|-------------|-------------------------------------------------------------------|--------------------|-----------------|-------------|
| Q86UP2      | Kinectin                                                          | KTN1               | 0.0001          | 0.98 ↓      |
| Q9P2E9      | Ribosome-binding protein 1                                        | RRBP1              | 0.0002          | 0.94 ↓      |
| P11388      | DNA topoisomerase 2-alpha                                         | TOP2A<br>TOP2      | 0.0004          | 0.92 ↓      |
| Q9BVP2      | Guanine nucleotide-binding protein-like 3                         | GNL3               | 0.0004          | 0.97 ↓      |
| P52292      | Importin subunit alpha-1                                          | KPNA2              | 0.0005          | 0.96 ↓      |
| P09486      | SPARC (Secreted protein acidic and rich in cysteine)              | SPARC              | 0.0007          | 0.93 ↓      |
| P12109      | Collagen alpha-1(VI) chain                                        | COL6A1             | 0.0008          | 0.96 ↓      |
| Q15582      | Transforming growth factor-beta-induced protein ig-h3             | TGFB1<br>BIGH3     | 0.001           | 0.91 ↓      |
| P16144      | Integrin beta-4                                                   | ITGB4              | 0.001           | 0.96 ↓      |
| P06576      | ATP synthase subunit beta                                         | ATP5F1B            | 0.001           | 0.98 ↓      |
| P26358      | DNA (cytosine-5)-methyltransferase 1 (Dnmt1)                      | DNMT1              | 0.002           | 0.98 ↓      |
| P07942      | Laminin subunit beta-1                                            | LAMB1              | 0.002           | 0.95 ↓      |
| P78347      | General transcription factor II-I (GTFII-I)                       | GTF2I              | 0.002           | 0.98 ↓      |
| Q01780      | Exosome component 10                                              | EXOSC10            | 0.003           | 0.96 ↓      |
| Q13185      | Chromobox protein homolog 3                                       | CBX3               | 0.003           | 0.96 ↓      |
| Q9Y4L1      | Hypoxia up-regulated protein 1                                    | HYOU1              | 0.004           | 0.99 ↓      |
| Q02241      | Kinesin-like protein KIF23                                        | KIF23              | 0.004           | 0.93 ↓      |
| P46013      | Proliferation marker protein Ki-67                                | MKI67              | 0.005           | 0.95 ↓      |
| Q08380      | Galectin-3-binding protein (Gal-3BP)                              | LGALS3BP           | 0.006           | 0.96 ↓      |
| Q8NI22      | Multiple coagulation factor deficiency protein 2                  | MCFD2              | 0.006           | 0.97 ↓      |
| P11166      | Solute carrier family 2, facilitated glucose transporter member 1 | SLC2A1<br>GLUT1    | 0.006           | 0.94 ↓      |
| P16615      | Sarcoplasmic/endoplasmic reticulum calcium ATPase 2 (SERCA2)      | ATP2A2<br>ATP2B    | 0.006           | 0.98 ↓      |
| O75643      | U5 small nuclear ribonucleoprotein 200 kDa helicase               | SNRNP200           | 0.007           | 0.99 ↓      |
| O60716      | Catenin delta-1 (Cadherin-associated Src substrate) (CAS)         | CTNND1<br>KIAA0384 | 0.008           | 0.96 ↓      |
| P05023      | Sodium/potassium-transporting ATPase subunit alpha-1              | ATP1A1             | 0.009           | 0.99 ↓      |
| P31689      | DnaJ homolog subfamily A member 1 (DnaJ protein homolog 2)        | DNAJA1<br>DNAJ2    | 0.01            | 0.97 ↓      |
| Q9H857      | 5'-nucleotidase domain-containing protein 2                       | NT5DC2             | 0.01            | 0.95 ↓      |

| <b>Protein IDs</b> | <b>Protein Names</b>                                                         | <b>Gene IDs</b> | <b><i>p</i>-value</b> | <b>Fold Change</b> |
|--------------------|------------------------------------------------------------------------------|-----------------|-----------------------|--------------------|
| Q92896             | Golgi apparatus protein 1 (CFR-1)                                            | GLG1            | 0.01                  | 0.97 ↓             |
| P13473             | Lysosome-associated membrane glycoprotein 2 (LAMP-2)                         | LAMP2           | 0.01                  | 0.99 ↓             |
| Q8NI27             | THO complex subunit 2 (Tho2)                                                 | THOC2           | 0.01                  | 0.98 ↓             |
| Q15005             | Signal peptidase complex subunit 2                                           | SPCS2           | 0.01                  | 0.96 ↓             |
| P35222             | Catenin beta-1 (Beta-catenin)                                                | CTNNB1          | 0.01                  | 0.95 ↓             |
| Q02809             | Procollagen-lysine,2-oxoglutarate 5-dioxygenase 1                            | PLOD1<br>LLH    | 0.01                  | 0.97 ↓             |
| P63208             | S-phase kinase-associated protein 1                                          | SKP1            | 0.01                  | 0.97 ↓             |
| P11047             | Laminin subunit gamma-1 (Laminin B2 chain)                                   | LAMB2           | 0.01                  | 0.95 ↓             |
| Q9BRJ6             | Uncharacterized protein C7orf50                                              | C7orf50         | 0.01                  | 0.98 ↓             |
| Q9BQ52             | Zinc phosphodiesterase ELAC protein 2                                        | ELAC2           | 0.01                  | 0.95 ↓             |
| Q9UH99             | SUN domain-containing protein 2                                              | SUN2            | 0.01                  | 0.93 ↓             |
| Q8TCJ2             | Dolichyl-diphosphooligosaccharide--protein glycosyltransferase subunit STT3B | STT3B<br>SIMP   | 0.02                  | 0.99 ↓             |
| Q7KZF4             | Staphylococcal nuclease domain-containing protein 1                          | SND1<br>TDRD11  | 0.02                  | 0.99 ↓             |
| Q13547             | Histone deacetylase 1 (HD1)                                                  | HDAC1           | 0.02                  | 0.98 ↓             |
| Q14980             | Nuclear mitotic apparatus protein 1                                          | NUMA1           | 0.02                  | 0.98 ↓             |
| O94925             | Glutaminase kidney isoform (GLS)/ (K-glutaminase)                            | GLS<br>GLS1     | 0.02                  | 0.98 ↓             |
| Q92922             | SWI/SNF complex subunit SMARCC1                                              | SMARCC1         | 0.02                  | 0.98 ↓             |
| P61769             | Beta-2-microglobulin                                                         | B2M             | 0.02                  | 0.95 ↓             |
| P67870             | Casein kinase II subunit beta (CK II beta)                                   | CSNK2B          | 0.02                  | 0.99 ↓             |
| P35052             | Glypican-1                                                                   | GPC1            | 0.02                  | 0.94 ↓             |
| P63092             | Guanine nucleotide-binding protein G(s) subunit alpha isoforms short         | GNAS<br>GNAS1   | 0.02                  | 0.97 ↓             |
| Q6P1J9             | Parafibromin                                                                 | CDC73           | 0.02                  | 0.93 ↓             |
| O94826             | Mitochondrial import receptor subunit TOM70                                  | TOMM70<br>TOM70 | 0.02                  | 0.99 ↓             |
| P08670             | Vimentin                                                                     | VIM             | 0.02                  | 0.99 ↓             |
| P62314             | Small nuclear ribonucleoprotein Sm D1                                        | SNRPD1          | 0.03                  | 0.98 ↓             |
| Q9NSE4             | Isoleucine--tRNA ligase                                                      | IARS2           | 0.03                  | 0.98 ↓             |
| P83916             | Chromobox protein homolog 1 (HP1Hsbeta)                                      | CBX1            | 0.03                  | 0.97 ↓             |
| Q9BRK5             | 45 kDa calcium-binding protein (Cab45)                                       | SDF4<br>CAB45   | 0.03                  | 0.98 ↓             |
| P38159             | RNA-binding motif protein, X chromosome                                      | RBMX            | 0.03                  | 0.99 ↓             |
| Q13838             | Spliceosome RNA helicase DDX39B                                              | DDX39B          | 0.03                  | 0.99 ↓             |
| O95232             | Luc7-like protein 3                                                          | LUC7L3          | 0.03                  | 0.99 ↓             |

| Protein IDs | Protein Names                                                   | Gene IDs        | <i>p</i> -value | Fold Change |
|-------------|-----------------------------------------------------------------|-----------------|-----------------|-------------|
| O43143      | Pre-mRNA-splicing factor ATP-dependent RNA helicase DHX15       | DHX15<br>DBP1   | 0.03            | 0.99 ↓      |
| P12236      | Solute carrier family 25 member 6                               | SLC25A6         | 0.04            | 0.98 ↓      |
| O60832      | H/ACA ribonucleoprotein complex subunit DKC1                    | DKC1<br>NOLA4   | 0.04            | 0.97 ↓      |
| Q5SRE5      | Nucleoporin NUP188 (hNup188)                                    | NUP188          | 0.04            | 0.99 ↓      |
| P98179      | RNA-binding protein 3 (RNA-binding motif protein 3) (RNPL)      | RBM3<br>RNPL    | 0.04            | 0.95 ↓      |
| P08559      | Pyruvate dehydrogenase E1 component subunit alpha               | PDHA1<br>PHE1A  | 0.04            | 0.97 ↓      |
| Q9Y5J1      | U3 small nucleolar RNA-associated protein 18 homolog            | UTP18           | 0.04            | 0.96 ↓      |
| P13010      | X-ray repair cross-complementing protein 5                      | XRCC5           | 0.04            | 0.99 ↓      |
| Q9H0S4      | Probable ATP-dependent RNA helicase DDX47 (DEAD box protein 47) | DDX47           | 0.04            | 0.95 ↓      |
| Q10713      | Mitochondrial-processing peptidase subunit alpha (Alpha-MPP)    | PMPCA<br>INPP5E | 0.04            | 0.98 ↓      |
| P07910      | Heterogeneous nuclear ribonucleoproteins C1/C2                  | HNRNPC          | 0.04            | 0.99 ↓      |
| Q6UVY6      | DBH-like monooxygenase protein 1                                | MOXD1           | 0.04            | 0.95 ↓      |
| P35659      | Protein DEK                                                     | DEK             | 0.04            | 0.98 ↓      |
| Q9NZL4      | Hsp70-binding protein 1 (HspBP1)                                | HSPBP1          | 0.04            | 1.02 ↑      |
| P12814      | Alpha-actinin-1                                                 | ACTN1           | 0.04            | 1.01 ↑      |
| P62913      | 60S ribosomal protein L11                                       | RPL11           | 0.04            | 1.01 ↑      |
| Q32MZ4      | Leucine-rich repeat flightless-interacting protein 1            | LRRFIP1         | 0.04            | 1.04 ↑      |
| P29317      | Ephrin type-A receptor 2                                        | EPHA2           | 0.04            | 1.02 ↑      |
| Q99426      | Tubulin-folding cofactor B                                      | TBCB            | 0.04            | 1.06 ↑      |
| Q16222      | UDP-N-acetylhexosamine pyrophosphorylase (Antigen X) (AGX)      | UAP1<br>SPAG2   | 0.04            | 1.02 ↑      |
| P18669      | Phosphoglycerate mutase 1                                       | PGAM1           | 0.04            | 1.02 ↑      |
| Q06323      | Proteasome activator complex subunit 1                          | PSME1           | 0.04            | 1.03 ↑      |
| P09936      | Ubiquitin carboxyl-terminal hydrolase isozyme L1 (UCH-L1)       | UCHL1           | 0.04            | 1.07 ↑      |
| P09211      | Glutathione S-transferase P                                     | GSTP1           | 0.04            | 1.02 ↑      |
| P04792      | Heat shock protein beta-1 (HspB1)                               | HSPB1           | 0.04            | 1.01 ↑      |
| Q9Y3F4      | Serine-threonine kinase receptor-associated protein             | STRAP           | 0.04            | 1.01 ↑      |
| Q96FW1      | Ubiquitin thioesterase OTUB1                                    | OTUB1           | 0.04            | 1.07 ↑      |
| O00154      | Cytosolic acyl coenzyme A thioester hydrolase                   | ACOT7           | 0.03            | 1.02 ↑      |

| Protein IDs | Protein Names                                                      | Gene IDs           | <i>p</i> -value | Fold Change |
|-------------|--------------------------------------------------------------------|--------------------|-----------------|-------------|
| Q04917      | 14-3-3 protein eta (Protein AS1)                                   | YWHAH              | 0.03            | 1.02 ↑      |
| P11413      | Glucose-6-phosphate 1-dehydrogenase (G6PD)                         | G6PD               | 0.03            | 1.04 ↑      |
| P23381      | Tryptophan--tRNA ligase                                            | WARS1              | 0.03            | 1.03 ↑      |
| P11766      | Alcohol dehydrogenase class-3                                      | ADH5<br>ADHX       | 0.03            | 1.03 ↑      |
| Q9NYL9      | Tropomodulin-3 (Ubiquitous tropomodulin)                           | TMOD3              | 0.03            | 1.01 ↑      |
| P68036      | Ubiquitin-conjugating enzyme E2 L3                                 | UBE2L3             | 0.03            | 1.03 ↑      |
| P62266      | 40S ribosomal protein S23                                          | RPS23              | 0.03            | 1.08 ↑      |
| P67809      | Y-box-binding protein 1 (YB-1)                                     | YBX1               | 0.03            | 1.02 ↑      |
| O95817      | BAG family molecular chaperone regulator 3 (BAG-3)                 | BAG3<br>BIS        | 0.03            | 1.07 ↑      |
| Q9NVA2      | Septin-11                                                          | SEPTIN11<br>SEPT11 | 0.03            | 1.02 ↑      |
| P31948      | Stress-induced-phosphoprotein 1 (STI1)                             | STIP1              | 0.03            | 1.02 ↑      |
| P34932      | Heat shock 70 kDa protein 4 (HSP70RY)                              | HSPA4              | 0.03            | 1.02 ↑      |
| Q02952      | A-kinase anchor protein 12 (AKAP-12)                               | AKAP12             | 0.03            | 1.05 ↑      |
| P49321      | Nuclear autoantigenic sperm protein (NASP)                         | NASP               | 0.03            | 1.01 ↑      |
| Q9H223      | EH domain-containing protein 4                                     | EHD4               | 0.03            | 1.02 ↑      |
| P52788      | Spermine synthase (SPMSY)                                          | SMS                | 0.03            | 1.03 ↑      |
| Q71U36      | Tubulin alpha-1A chain (Alpha-tubulin 3)                           | TUBA1A             | 0.03            | 1.02 ↑      |
| O75369      | Filamin-B (FLN-B)                                                  | FLNB               | 0.02            | 1.01 ↑      |
| P11142      | Heat shock cognate 71 kDa protein                                  | HSPA8<br>HSC70     | 0.02            | 1.01 ↑      |
| P27695      | DNA-(apurinic or apyrimidinic site) endonuclease                   | APEX1<br>APE       | 0.02            | 1.02 ↑      |
| P49327      | Fatty acid synthase                                                | FASN/ FAS          | 0.02            | 1.02 ↑      |
| P24666      | Low molecular weight phosphotyrosine protein phosphatase (LMW-PTP) | ACP1               | 0.02            | 1.03 ↑      |
| Q9UQ80      | Proliferation-associated protein 2G4                               | PA2G4              | 0.02            | 1.02 ↑      |
| P11908      | Ribose-phosphate pyrophosphokinase 2                               | PRPS2              | 0.02            | 1.02 ↑      |
| Q13501      | Sequestosome-1 (EBI3-associated protein of 60 kDa) (EBIAP) (p60)   | SQSTM1             | 0.02            | 1.05 ↑      |
| P10768      | S-formylglutathione hydrolase (FGH)                                | ESD                | 0.02            | 1.02 ↑      |
| P60174      | Triosephosphate isomerase (TIM)                                    | TPI1/ TPI          | 0.02            | 1.03 ↑      |
| Q9Y266      | Nuclear migration protein nudC                                     | NUDC               | 0.02            | 1.03 ↑      |
| P59998      | Actin-related protein 2/3 complex subunit 4                        | ARPC4              | 0.02            | 1.02 ↑      |
| P35579      | Myosin-9                                                           | MYH9               | 0.02            | 1.02 ↑      |
| P46821      | Microtubule-associated protein 1B (MAP-1B)                         | MAP1B              | 0.02            | 1.02 ↑      |
| P08133      | Annexin A6 (Annexin VI)                                            | ANXA6              | 0.02            | 1.01 ↑      |



| <b>Protein IDs</b> | <b>Protein Names</b>                                                             | <b>Gene IDs</b>   | <b>p-value</b> | <b>Fold Change</b> |
|--------------------|----------------------------------------------------------------------------------|-------------------|----------------|--------------------|
| P27348             | 14-3-3 protein theta (14-3-3 protein T-cell)                                     | YWHAQ             | 0.02           | 1.03 ↑             |
| Q15181             | Inorganic pyrophosphatase (EC 3.6.1.1) (Pyrophosphate phospho-hydrolase) (PPase) | PPA1              | 0.02           | 1.03 ↑             |
| P62826             | GTP-binding nuclear protein Ran                                                  | RAN               | 0.02           | 1.02 ↑             |
| Q9Y2J8             | Protein-arginine deiminase type-2                                                | PADI2             | 0.02           | 1.02 ↑             |
| Q99613             | Eukaryotic translation initiation factor 3 subunit C (eIF3c)                     | EIF3C<br>EIF3S8   | 0.02           | 1.00 ↑             |
| P60983             | Glia maturation factor beta (GMF-beta)                                           | GMFB              | 0.02           | 1.03 ↑             |
| P12268             | Inosine-5'-monophosphate dehydrogenase 2 (IMP dehydrogenase 2) (IMPD 2)          | IMPDH2<br>IMPD2   | 0.02           | 1.03 ↑             |
| Q27J81             | Inverted formin-2 (HBEBP2-binding protein C)                                     | INF2              | 0.02           | 1.02 ↑             |
| P61088             | Ubiquitin-conjugating enzyme E2 N                                                | UBE2N             | 0.02           | 1.03 ↑             |
| P52907             | F-actin-capping protein subunit alpha-1 (CapZ alpha-1)                           | CAPZA1            | 0.01           | 1.02 ↑             |
| Q13442             | 28 kDa heat- and acid-stable phosphoprotein (PDGF-associated protein) (PAP)      | PDAP1<br>HASPP28  | 0.01           | 1.05 ↑             |
| Q15185             | Prostaglandin E synthase 3                                                       | PTGES3            | 0.01           | 1.01 ↑             |
| P35244             | Replication protein A 14 kDa subunit (RP-A p14)                                  | RPA3<br>RPA14     | 0.01           | 1.02 ↑             |
| P50395             | Rab GDP dissociation inhibitor beta (Rab GDI beta)                               | GDI2<br>RABGDIB   | 0.01           | 1.02 ↑             |
| Q9BVG4             | Protein PBDC1 (Polysaccharide biosynthesis domain-containing protein 1)          | PBDC1<br>CXorf26  | 0.01           | 1.05 ↑             |
| Q99733             | Nucleosome assembly protein 1-like 4                                             | NAP1L4            | 0.01           | 1.02 ↑             |
| Q7Z2W4             | Zinc finger CCCH-type antiviral protein 1                                        | ZC3HAV1           | 0.01           | 1.02 ↑             |
| Q96QK1             | Vacuolar protein sorting-associated protein 35                                   | VPS35             | 0.01           | 1.02 ↑             |
| P06744             | Glucose-6-phosphate isomerase (GPI)                                              | GPI               | 0.01           | 1.02 ↑             |
| Q9BZQ8             | Protein Niban 1 (Protein FAM129A)                                                | NIBAN1<br>FAM129A | 0.01           | 1.03 ↑             |
| P52209             | 6-phosphogluconate dehydrogenase, decarboxylating                                | PGD<br>PGDH       | 0.01           | 1.02 ↑             |
| Q9BRA2             | Thioredoxin domain-containing protein 17                                         | TXNDC17           | 0.01           | 1.04 ↑             |
| P22061             | Protein-L-isoaspartate(D-aspartate) O-methyltransferase (PIMT)                   | PCMT1             | 0.01           | 1.03 ↑             |
| P23528             | Cofilin-1                                                                        | CFL1              | 0.01           | 1.02 ↑             |
| P49591             | Serine--tRNA ligase                                                              | SARS1             | 0.01           | 1.03 ↑             |
| Q16658             | Fascin                                                                           | FSCN1             | 0.01           | 1.03 ↑             |
| O00299             | Chloride intracellular channel protein 1                                         | CLIC1             | 0.009          | 1.03 ↑             |
| P33316             | Deoxyuridine 5'-triphosphate nucleotidohydrolase, mitochondrial (dUTPase)        | DUT               | 0.009          | 1.01 ↑             |



| <b>Protein IDs</b> | <b>Protein Names</b>                                                                     | <b>Gene IDs</b>          | <b>p-value</b> | <b>Fold Change</b> |
|--------------------|------------------------------------------------------------------------------------------|--------------------------|----------------|--------------------|
| P15311             | Ezrin (Cytovillin) (Villin-2) (p81)                                                      | EZR VIL2                 | 0.009          | 1.02 ↑             |
| P30085             | UMP-CMP kinase                                                                           | CMPK1<br>CMK<br>CMPK     | 0.009          | 1.03 ↑             |
| O95218             | Zinc finger Ran-binding domain-containing protein 2                                      | ZRANB2                   | 0.009          | 1.04 ↑             |
| P31946             | 14-3-3 protein beta/alpha (Protein 1054) (Protein kinase C inhibitor protein 1) (KCIP-1) | YWHAB                    | 0.008          | 1.02 ↑             |
| Q8TAT6             | Nuclear protein localization protein 4 homolog                                           | NPLOC4                   | 0.008          | 1.03 ↑             |
| P30086             | Phosphatidylethanolamine-binding protein 1 (PEBP-1)                                      | PEBP1/<br>PBP/ PEBP      | 0.008          | 1.04 ↑             |
| P30041             | Peroxiredoxin-6                                                                          | PRDX6                    | 0.008          | 1.02 ↑             |
| P46940             | Ras GTPase-activating-like protein IQGAP1 (p195)                                         | IQGAP1<br>KIAA0051       | 0.008          | 1.01 ↑             |
| P52565             | Rho GDP-dissociation inhibitor 1 (Rho GDI 1)                                             | ARHGDIA                  | 0.007          | 1.04 ↑             |
| O60664             | Perilipin-3                                                                              | PLIN3                    | 0.007          | 1.04 ↑             |
| P41250             | Glycine--tRNA ligase                                                                     | GARS1<br>GARS            | 0.007          | 1.03 ↑             |
| P11586             | C-1-tetrahydrofolate synthase, Methylenetetrahydrofolate dehydrogenase                   | MTHFD1<br>MTHFC<br>MTHFD | 0.007          | 1.02 ↑             |
| P31150             | Rab GDP dissociation inhibitor alpha (Rab GDI alpha)                                     | GDI1<br>GDIL             | 0.007          | 1.04 ↑             |
| P50990             | T-complex protein 1 subunit theta (TCP-1-theta)                                          | CCT8<br>CCTQ             | 0.007          | 1.01 ↑             |
| P37802             | Transgelin-2 (Epididymis tissue protein Li 7e)                                           | TAGLN2                   | 0.007          | 1.02 ↑             |
| Q14019             | Coactosin-like protein                                                                   | COTL1                    | 0.007          | 1.04 ↑             |
| Q15102             | Platelet-activating factor acetylhydrolase IB subunit alpha1                             | PAFAH1B3                 | 0.006          | 1.02 ↑             |
| P06733             | Alpha-enolase                                                                            | ENO1                     | 0.006          | 1.03 ↑             |
| P21291             | Cysteine and glycine-rich protein 1                                                      | CSRP1<br>CSRP            | 0.006          | 1.05 ↑             |
| P04083             | Annexin A1 (Annexin I)                                                                   | ANXA1                    | 0.006          | 1.02 ↑             |
| P39748             | Flap endonuclease 1 (FEN-1)                                                              | FEN1<br>RAD2             | 0.005          | 1.03 ↑             |
| P84077             | ADP-ribosylation factor 1                                                                | ARF1                     | 0.005          | 1.02 ↑             |
| P67936             | Tropomyosin alpha-4 chain (TM30p1)                                                       | TPM4                     | 0.005          | 1.02 ↑             |
| P22234             | Multifunctional protein ADE2                                                             | PAICS<br>ADE2            | 0.005          | 1.02 ↑             |
| P20042             | Eukaryotic translation initiation factor 2 subunit 2                                     | EIF2S2                   | 0.004          | 1.02 ↑             |

| <b>Protein IDs</b> | <b>Protein Names</b>                                                      | <b>Gene IDs</b> | <b><i>p</i>-value</b> | <b>Fold Change</b> |
|--------------------|---------------------------------------------------------------------------|-----------------|-----------------------|--------------------|
| Q9BUF5             | Tubulin beta-6 chain                                                      | TUBB6           | 0.004                 | 1.03 ↑             |
| Q14192             | Four and a half LIM domains protein 2 (FHL-2)                             | FHL2            | 0.003                 | 1.03 ↑             |
| O95373             | Importin-7 (Imp7)                                                         | IPO7            | 0.003                 | 1.01 ↑             |
| O43707             | Alpha-actinin-4 (Non-muscle alpha-actinin 4)                              | ACTN4           | 0.003                 | 1.01 ↑             |
| O43175             | D-3-phosphoglycerate dehydrogenase (3-PGDH)                               | PHGDH<br>PGDH3  | 0.003                 | 1.03 ↑             |
| P27694             | Replication protein A 70 kDa DNA-binding subunit                          | RPA1<br>RPA70   | 0.003                 | 1.03 ↑             |
| P14618             | Pyruvate kinase PKM                                                       | PKM/ OIP3       | 0.003                 | 1.02 ↑             |
| P16949             | Stathmin                                                                  | STMN1           | 0.002                 | 1.02 ↑             |
| Q99497             | Parkinson disease protein 7                                               | PARK7           | 0.002                 | 1.04 ↑             |
| P15559             | NAD(P)H dehydrogenase [quinone] 1                                         | NQO1            | 0.001                 | 1.03 ↑             |
| Q92945             | Far upstream element-binding protein 2 (FUSE-binding protein 2)           | KHSRP<br>FUBP2  | 0.001                 | 1.01 ↑             |
| P05387             | 60S acidic ribosomal protein P2                                           | RPLP2           | 0.001                 | 1.01 ↑             |
| P05388             | 60S acidic ribosomal protein P0                                           | RPLP0           | 0.0010                | 1.01 ↑             |
| P49773             | Histidine triad nucleotide-binding protein 1                              | HINT1           | 0.0009                | 1.03 ↑             |
| P50502             | Hsc70-interacting protein (Hip)                                           | ST13<br>FAM10A1 | 0.0009                | 1.02 ↑             |
| P68366             | Tubulin alpha-4A chain (Alpha-tubulin 1)                                  | TUBA4A          | 0.0007                | 1.03 ↑             |
| P21333             | Filamin-A (FLN-A)                                                         | FLNA/ FLN       | 0.0007                | 1.02 ↑             |
| P07195             | L-lactate dehydrogenase B chain (LDH-B)                                   | LDHB            | 0.0005                | 1.03 ↑             |
| Q02790             | Peptidyl-prolyl cis-trans isomerase FKBP4 (PPIase FKBP4)                  | FKBP4<br>FKBP52 | 0.0005                | 1.02 ↑             |
| P23526             | Adenosylhomocysteinase (AdoHcyase)                                        | AHCY            | 0.0004                | 1.03 ↑             |
| P08758             | Annexin A5 (Annexin V)                                                    | ANXA5           | 0.0003                | 1.02 ↑             |
| P32119             | Peroxiredoxin-2                                                           | PRDX2           | 0.0003                | 1.03 ↑             |
| P40925             | Malate dehydrogenase                                                      | MDH1            | 0.0002                | 1.02 ↑             |
| P63104             | 14-3-3 protein zeta/delta (Protein kinase C inhibitor protein 1) (KCIP-1) | YWHAZ           | 0.0002                | 1.03 ↑             |
| Q9NR12             | PDZ and LIM domain protein 7                                              | PDLIM7          | 0.0001                | 1.03 ↑             |
| P22102             | Trifunctional purine biosynthetic protein adenosine-3                     | GART            | 0.00009               | 1.03 ↑             |

**Table S3.** List of altered proteins in U118 cells versus Control, after treatment with 0.5  $\mu$ M ST1926 for 2 hours. A total of 96 proteins with significant changes (45 downregulated (↓) and 51 upregulated (↑)) were identified in U118 cells with  $p < 0.05$ .

| Protein IDs | Protein Names                                                                                                   | Gene IDs          | <i>p</i> -value | Fold Change |
|-------------|-----------------------------------------------------------------------------------------------------------------|-------------------|-----------------|-------------|
| Q96TA1      | Protein Niban 2(Protein FAM129B)                                                                                | NIBAN2<br>FAM129B | 0.00004         | 0.97 ↓      |
| P52294      | Importin subunit alpha-5                                                                                        | KPNA1             | 0.0006          | 0.91 ↓      |
| P26641      | Elongation factor 1-gamma                                                                                       | EEF1G<br>EF1G     | 0.001           | 0.99 ↓      |
| P11216      | Glycogen phosphorylase                                                                                          | PYGB              | 0.002           | 0.99 ↓      |
| Q99733      | Nucleosome assembly protein 1-like 4                                                                            | NAP1L4            | 0.003           | 0.98 ↓      |
| P11388      | DNA topoisomerase 2-alpha                                                                                       | TOP2A<br>TOP2     | 0.003           | 0.96 ↓      |
| Q15417      | Calponin-3                                                                                                      | CNN3              | 0.004           | 0.97 ↓      |
| P46109      | Crk-like protein                                                                                                | CRKL              | 0.007           | 0.99 ↓      |
| P31939      | Bifunctional purine biosynthesis protein<br>ATIC (AICAR transformylase/inosine<br>monophosphate cyclohydrolase) | ATIC<br>PURH      | 0.01            | 0.99 ↓      |
| Q14192      | Four and a half LIM domains protein 2<br>(FHL-2)                                                                | FHL2              | 0.01            | 0.99 ↓      |
| P17301      | Integrin alpha-2 (CD49 antigen-like family<br>member B)                                                         | ITGA2<br>CD49B    | 0.01            | 0.97 ↓      |
| P62851      | 40S ribosomal protein S25                                                                                       | RPS25             | 0.01            | 0.98 ↓      |
| P08708      | 40S ribosomal protein S17                                                                                       | RPS17             | 0.01            | 0.98 ↓      |
| P61289      | Proteasome activator complex subunit 3 (11S<br>regulator complex subunit gamma)                                 | PSME3             | 0.02            | 0.99 ↓      |
| P55060      | Exportin-2 (Exp2)                                                                                               | XPO2              | 0.02            | 0.99 ↓      |
| P53004      | Biliverdin reductase A (BVR A)                                                                                  | BLVRA<br>BLVR     | 0.02            | 0.98 ↓      |
| P31150      | Rab GDP dissociation inhibitor alpha (Rab<br>GDI alpha)                                                         | GDI1<br>GDIL      | 0.02            | 0.98 ↓      |
| Q14204      | Cytoplasmic dynein 1 heavy chain 1                                                                              | DYNC1H1           | 0.02            | 0.99 ↓      |
| Q8NBT2      | Kinetochore protein Spc24                                                                                       | SPC24             | 0.02            | 0.96 ↓      |
| Q96C19      | EF-hand domain-containing protein D2                                                                            | EFHD2             | 0.02            | 0.99 ↓      |
| Q9H0S4      | Probable ATP-dependent RNA helicase<br>DDX47 (DEAD box protein 47)                                              | DDX47             | 0.03            | 0.99 ↓      |
| P62081      | 40S ribosomal protein S7                                                                                        | RPS7              | 0.03            | 0.97 ↓      |
| Q14157      | Ubiquitin-associated protein 2-like                                                                             | UBAP2L            | 0.03            | 0.91 ↓      |
| Q96HC4      | PDZ and LIM domain protein 5                                                                                    | PDLIM5            | 0.03            | 0.96 ↓      |
| P14618      | Pyruvate kinase PKM                                                                                             | PKM/ OIP3         | 0.03            | 0.99 ↓      |

| Protein IDs | Protein Names                                                           | Gene IDs           | <i>p</i> -value | Fold Change |
|-------------|-------------------------------------------------------------------------|--------------------|-----------------|-------------|
| P24534      | Elongation factor 1-beta (EF-1-beta)                                    | EEF1B2<br>EEF1B    | 0.03            | 0.99 ↓      |
| P02751      | Fibronectin (FN)                                                        | FN1 FN             | 0.04            | 0.93 ↓      |
| Q9BUF5      | Tubulin beta-6 chain                                                    | TUBB6              | 0.04            | 0.97 ↓      |
| P17612      | cAMP-dependent protein kinase catalytic subunit alpha (PKA C-alpha)     | PRKACA<br>PKACA    | 0.04            | 0.96 ↓      |
| Q9BVG4      | Protein PBDC1 (Polysaccharide biosynthesis domain-containing protein 1) | PBDC1<br>CXorf26   | 0.04            | 0.97 ↓      |
| P27708      | CAD protein                                                             | CAD                | 0.04            | 0.99 ↓      |
| Q14008      | Cytoskeleton-associated protein 5                                       | CKAP5              | 0.04            | 0.98 ↓      |
| P16403      | Histone H1.2                                                            | H1-2<br>HIST1H1C   | 0.04            | 0.98 ↓      |
| Q01813      | ATP-dependent 6-phosphofructokinase                                     | PFKP PFKF          | 0.04            | 0.99 ↓      |
| Q9NTK5      | Obg-like ATPase 1                                                       | OLA1               | 0.04            | 0.99 ↓      |
| P50991      | T-complex protein 1 subunit delta (TCP-1-delta)                         | CCT4<br>CCTD       | 0.04            | 0.99 ↓      |
| P52888      | Thimet oligopeptidase                                                   | THOP1              | 0.04            | 0.98 ↓      |
| Q96T76      | MMS19 nucleotide excision repair protein homolog (hMMS19)               | MMS19<br>MMS19L    | 0.04            | 0.98 ↓      |
| P00492      | Hypoxanthine-guanine phosphoribosyltransferase (HGPRT)                  | HPRT1<br>HPRT      | 0.04            | 0.97 ↓      |
| P48643      | T-complex protein 1 subunit epsilon (TCP-1-epsilon)                     | CCT5<br>CCTE       | 0.040           | 0.99 ↓      |
| P46940      | Ras GTPase-activating-like protein IQGAP1 (p195)                        | IQGAP1<br>KIAA0051 | 0.040           | 0.99 ↓      |
| P68371      | Tubulin beta-4B chain (Tubulin beta-2 chain)                            | TUBB4B<br>TUBB2C   | 0.040           | 0.97 ↓      |
| P35637      | RNA-binding protein FUS                                                 | FUS TLS            | 0.040           | 0.99 ↓      |
| P22234      | Multifunctional protein ADE2                                            | PAICS<br>ADE2      | 0.04            | 0.98 ↓      |
| Q6UVK1      | Chondroitin sulfate proteoglycan 4                                      | CSPG4              | 0.04            | 0.99 ↓      |
| Q9Y5L4      | Mitochondrial import inner membrane translocase subunit Tim13           | TIMM13             | 0.04            | 1.01 ↑      |
| Q15393      | Splicing factor 3B subunit 3                                            | SF3B3              | 0.04            | 1.01 ↑      |
| Q9NZ01      | Very-long-chain enoyl-CoA reductase                                     | TECR               | 0.04            | 1.02 ↑      |
| Q14103      | Heterogeneous nuclear ribonucleoprotein D0 (hnRNP D0)                   | HNRNPD<br>AUF1     | 0.04            | 1.01 ↑      |
| P35579      | Myosin-9                                                                | MYH9               | 0.04            | 1.01 ↑      |
| Q14566      | DNA replication licensing factor MCM6                                   | MCM6               | 0.04            | 1.02 ↑      |
| P10809      | 60 kDa heat shock protein (Chaperonin 60)                               | HSPD1<br>HSP60     | 0.04            | 1.01 ↑      |

| Protein IDs | Protein Names                                             | Gene IDs        | <i>p</i> -value | Fold Change |
|-------------|-----------------------------------------------------------|-----------------|-----------------|-------------|
| P17931      | Galectin-3 (Gal-3)                                        | LGALS3          | 0.04            | 1.01 ↑      |
| P67812      | Signal peptidase complex catalytic subunit SEC11A         | SEC11A          | 0.04            | 1.02 ↑      |
| P38117      | Electron transfer flavoprotein subunit beta (Beta-ETF)    | ETFB<br>FP585   | 0.04            | 1.02 ↑      |
| Q8WWM7      | Ataxin-2-like protein                                     | ATXN2L          | 0.04            | 1.03 ↑      |
| Q12888      | TP53-binding protein 1 (p53BP1)                           | TP53BP1         | 0.04            | 1.02 ↑      |
| P02786      | Transferrin receptor protein 1 (TfR1)                     | TFRC            | 0.03            | 1.01 ↑      |
| P09972      | Fructose-bisphosphate aldolase C                          | ALDOC           | 0.03            | 1.01 ↑      |
| P14625      | Endoplasmic                                               | HSP90B1         | 0.03            | 1.01 ↑      |
| P10620      | Microsomal glutathione S-transferase 1 (Microsomal GST-1) | MGST1<br>GST12  | 0.03            | 1.03 ↑      |
| O75533      | Splicing factor 3B subunit 1                              | SF3B1           | 0.03            | 1.01 ↑      |
| Q8NBJ5      | Procollagen galactosyltransferase 1                       | COLGALT<br>1    | 0.03            | 1.02 ↑      |
| P51659      | Peroxisomal multifunctional enzyme type 2 (MFE-2)         | HSD17B4         | 0.03            | 1.02 ↑      |
| O60443      | Gasdermin-E                                               | GSDME           | 0.03            | 1.01 ↑      |
| P52597      | Heterogeneous nuclear ribonucleoprotein F (hnRNP F)       | HNRNPF<br>HNRPF | 0.03            | 1.01 ↑      |
| Q92878      | DNA repair protein RAD50 (hRAD50)                         | RAD50           | 0.03            | 1.01 ↑      |
| Q96N66      | Lysophospholipid acyltransferase 7 (LPLAT 7)              | MBOAT7          | 0.03            | 1.01 ↑      |
| P35232      | Prohibitin                                                | PHB             | 0.03            | 1.01 ↑      |
| Q99798      | Aconitate hydratase (Aconitase)                           | ACO2            | 0.02            | 1.01 ↑      |
| P30519      | Heme oxygenase 2 (HO-2)                                   | HMOX2<br>HO2    | 0.02            | 1.02 ↑      |
| P34897      | Serine hydroxymethyltransferase (SHMT)                    | SHMT2           | 0.02            | 1.01 ↑      |
| P11021      | Endoplasmic reticulum chaperone BiP                       | HSPA5           | 0.02            | 1.02 ↑      |
| P14866      | Heterogeneous nuclear ribonucleoprotein L (hnRNP L)       | HNRNPL<br>HNRPL | 0.02            | 1.01 ↑      |
| P25788      | Proteasome subunit alpha type-3                           | PSMA3           | 0.02            | 1.02 ↑      |
| O75396      | Vesicle-trafficking protein SEC22b                        | SEC22B          | 0.02            | 1.03 ↑      |
| P30048      | Thioredoxin-dependent peroxide reductase                  | PRDX3           | 0.02            | 1.01 ↑      |
| O95817      | BAG family molecular chaperone regulator 3 (BAG-3)        | BAG3<br>BIS     | 0.02            | 1.01 ↑      |
| Q15907      | Ras-related protein Rab-11B                               | RAB11B          | 0.01            | 1.01 ↑      |
| Q15424      | Scaffold attachment factor B1 (SAF-B)                     | SAFB<br>HAP     | 0.01            | 1.02 ↑      |
| O15258      | Protein RER1                                              | RER1            | 0.01            | 1.02 ↑      |

| Protein IDs | Protein Names                                                          | Gene IDs          | <i>p</i> -value | Fold Change |
|-------------|------------------------------------------------------------------------|-------------------|-----------------|-------------|
| P05413      | Fatty acid-binding protein 3                                           | FABP3             | 0.01            | 1.02 ↑      |
| O00264      | Membrane-associated progesterone receptor component 1 (mPR)            | PGRMC1            | 0.009           | 1.03 ↑      |
| P23284      | Peptidyl-prolyl cis-trans isomerase B (PPIase B)                       | PPIB              | 0.008           | 1.01 ↑      |
| P37837      | Transaldolase                                                          | TALDO1            | 0.008           | 1.02 ↑      |
| P61421      | V-type proton ATPase subunit d 1 (V-ATPase subunit d 1)                | ATP6V0D1<br>ATP6D | 0.007           | 1.01 ↑      |
| Q15459      | Splicing factor 3A subunit 1 (SF3a120)                                 | SF3A1             | 0.006           | 1.02 ↑      |
| P50416      | Carnitine O-palmitoyltransferase 1 (CPT1-L)                            | CPT1A             | 0.006           | 1.01 ↑      |
| P02545      | Prelamin-A/C                                                           | LMNA              | 0.006           | 1.01 ↑      |
| P38646      | Stress-70 protein (Heat shock 70 kDa protein 9)                        | HSPA9             | 0.005           | 1.01 ↑      |
| Q92841      | Probable ATP-dependent RNA helicase DDX17 (DEAD box protein 17)        | DDX17             | 0.005           | 1.01 ↑      |
| P40926      | Malate dehydrogenase                                                   | MDH2              | 0.005           | 1.01 ↑      |
| P51148      | Ras-related protein Rab-5C (RAB5L)                                     | RAB5C             | 0.004           | 1.02 ↑      |
| Q13011      | Delta(3,5)-Delta(2,4)-dienoyl-CoA isomeras, mitochondrial (EC 5.3.3.-) | ECH1              | 0.004           | 1.02 ↑      |
| O94979      | Protein transport protein Sec31A                                       | SEC31A            | 0.001           | 1.01 ↑      |
| P04216      | Thy-1 membrane glycoprotein                                            | THY1              | 0.0006          | 1.03 ↑      |

**Table S4.** List of altered proteins in U118 cells versus Control, after treatment with 0.5  $\mu$ M ST1926 for 24 hours. A total of 71 proteins with significant changes (35 downregulated (↓) and 36 upregulated (↑)) were identified in U118 cells with  $p < 0.05$ .

| Protein IDs | Protein Names                                                                     | Gene IDs          | <i>p</i> -value | Fold Change |
|-------------|-----------------------------------------------------------------------------------|-------------------|-----------------|-------------|
| P11388      | DNA topoisomerase 2-alpha                                                         | TOP2A<br>TOP2     | 0.0001          | 0.95 ↓      |
| P52294      | Importin subunit alpha-5                                                          | KPNA1             | 0.0006          | 0.91 ↓      |
| Q5SSJ5      | Heterochromatin protein 1-binding protein 3                                       | HP1BP3            | 0.001           | 0.98 ↓      |
| P35221      | Catenin alpha-1 (Alpha E-catenin)                                                 | CTNNA1            | 0.004           | 0.99 ↓      |
| P04899      | Guanine nucleotide-binding protein G(i) subunit alpha-2                           | GNAI2<br>GNAI2B   | 0.006           | 0.98 ↓      |
| P62979      | Ubiquitin-40S ribosomal protein S27a                                              | RPS27A            | 0.007           | 0.98 ↓      |
| Q96TA1      | Protein Niban 2 (Protein FAM129B)                                                 | NIBAN2<br>FAM129B | 0.007           | 0.98 ↓      |
| Q01082      | Spectrin beta chain                                                               | SPTBN1            | 0.008           | 0.99 ↓      |
| Q53GQ0      | Very-long-chain 3-oxoacyl-CoA reductase                                           | HSD17B12          | 0.01            | 0.98 ↓      |
| P12109      | Collagen alpha-1(VI) chain                                                        | COL6A1            | 0.01            | 0.99 ↓      |
| P12111      | Collagen alpha-3(VI) chain                                                        | COL6A3            | 0.01            | 0.97 ↓      |
| Q13148      | TAR DNA-binding protein 43 (TDP-43)                                               | TARDBP<br>TDP43   | 0.01            | 0.99 ↓      |
| P40763      | Signal transducer and activator of transcription 3                                | STAT3<br>APRF     | 0.01            | 0.98 ↓      |
| O75534      | Cold shock domain-containing protein E1                                           | CSDE1             | 0.02            | 0.99 ↓      |
| P04181      | Ornithine aminotransferase                                                        | OAT               | 0.02            | 0.98 ↓      |
| Q09666      | Neuroblast differentiation-associated protein AHNAK (Desmoyokin)                  | AHNAK<br>PM227    | 0.02            | 0.99 ↓      |
| Q01813      | ATP-dependent 6-phosphofructokinase                                               | PFKP              | 0.03            | 0.99 ↓      |
| Q99733      | Nucleosome assembly protein 1-like 4                                              | NAP1L4            | 0.03            | 0.99 ↓      |
| Q9Y5L0      | Transportin-3                                                                     | TNPO3             | 0.03            | 0.98 ↓      |
| P62273      | 40S ribosomal protein S29                                                         | RPS29             | 0.03            | 0.98 ↓      |
| O14980      | Exportin-1 (Exp1)                                                                 | XPO1              | 0.03            | 0.99 ↓      |
| Q9BTT0      | Acidic leucine-rich nuclear phosphoprotein 32 family member E (LANP-like protein) | ANP32E            | 0.03            | 0.99 ↓      |
| P47756      | F-actin-capping protein subunit beta (CapZ beta)                                  | CAPZB             | 0.03            | 0.99 ↓      |
| P49773      | Histidine triad nucleotide-binding protein 1                                      | HINT1             | 0.04            | 0.96 ↓      |
| Q5T4S7      | E3 ubiquitin-protein ligase UBR4                                                  | UBR4              | 0.04            | 0.98 ↓      |
| P49720      | Proteasome subunit beta type-3                                                    | PSMB3             | 0.04            | 0.99 ↓      |
| Q9UH99      | SUN domain-containing protein 2                                                   | SUN2              | 0.04            | 0.96 ↓      |
| P20073      | Annexin A7                                                                        | ANXA7<br>ANX7     | 0.04            | 0.99 ↓      |



| Protein IDs | Protein Names                                                                                             | Gene IDs           | <i>p</i> -value | Fold Change |
|-------------|-----------------------------------------------------------------------------------------------------------|--------------------|-----------------|-------------|
| Q96P70      | Importin-9 (Imp9)                                                                                         | IPO9               | 0.04            | 0.98 ↓      |
| O76094      | Signal recognition particle subunit SRP72                                                                 | SRP72              | 0.04            | 0.98 ↓      |
| Q6IBS0      | Twinfilin-2                                                                                               | TWF2               | 0.04            | 0.97 ↓      |
| P31939      | Bifunctional purine biosynthesis protein ATIC (AICAR transformylase/inosine monophosphate cyclohydrolase) | ATIC<br>PURH       | 0.04            | 0.99 ↓      |
| O60568      | Multifunctional procollagen lysine hydroxylase and glycosyltransferase LH3                                | PLOD3              | 0.04            | 0.97 ↓      |
| P42224      | Signal transducer and activator of transcription 1-alpha/beta                                             | STAT1              | 0.04            | 0.99 ↓      |
| P12956      | X-ray repair cross-complementing protein 6                                                                | XRCC6              | 0.04            | 0.98 ↓      |
| P26641      | Elongation factor 1-gamma (EF-1-gamma)                                                                    | EEF1G<br>EF1G      | 0.04            | 1.01 ↑      |
| P13473      | Lysosome-associated membrane glycoprotein 2 (LAMP-2)                                                      | LAMP2              | 0.04            | 1.01 ↑      |
| P11021      | Endoplasmic reticulum chaperone BiP                                                                       | HSPA5              | 0.04            | 1.02 ↑      |
| P55084      | Trifunctional enzyme subunit beta                                                                         | HADHB              | 0.04            | 1.01 ↑      |
| P54819      | Adenylate kinase 2 (AK 2)                                                                                 | AK2 ADK2           | 0.04            | 1.01 ↑      |
| P17931      | Galectin-3 (Gal-3)                                                                                        | LGALS3             | 0.04            | 1.02 ↑      |
| Q9BYG3      | MKI67 FHA domain-interacting nucleolar phosphoprotein                                                     | NIFK<br>MKI67IP    | 0.04            | 1.04 ↑      |
| P14625      | Endoplasmin                                                                                               | HSP90B1            | 0.04            | 1.01 ↑      |
| Q9P2J5      | Leucine--tRNA ligase                                                                                      | LARS1              | 0.04            | 1.01 ↑      |
| P49411      | Elongation factor Tu (EF-Tu)                                                                              | TUFM               | 0.04            | 1.00 ↑      |
| Q8NBJ5      | Procollagen galactosyltransferase 1                                                                       | COLGALT<br>1       | 0.03            | 1.01 ↑      |
| O43237      | Cytoplasmic dynein 1 light intermediate chain 2                                                           | DYNC1LI2           | 0.03            | 1.01 ↑      |
| Q8N6T3      | ADP-ribosylation factor GTPase-activating protein 1 (ARF GAP 1)                                           | ARFGAP1<br>ARF1GAP | 0.03            | 1.02 ↑      |
| P68366      | Tubulin alpha-4A chain (Alpha-tubulin 1)                                                                  | TUBA4A             | 0.03            | 1.01 ↑      |
| P51148      | Ras-related protein Rab-5C (RAB5L)                                                                        | RAB5C              | 0.03            | 1.02 ↑      |
| P41252      | Isoleucine--tRNA ligase                                                                                   | IARS1              | 0.03            | 1.01 ↑      |
| P30519      | Heme oxygenase 2 (HO-2)                                                                                   | HMOX2<br>HO2       | 0.03            | 1.02 ↑      |
| Q14566      | DNA replication licensing factor MCM6                                                                     | MCM6               | 0.03            | 1.02 ↑      |
| P23284      | Peptidyl-prolyl cis-trans isomerase B (PPIase B)                                                          | PPIB               | 0.03            | 1.02 ↑      |
| Q15459      | Splicing factor 3A subunit 1 (SF3a120)                                                                    | SF3A1              | 0.03            | 1.01 ↑      |
| P08195      | 4F2 cell-surface antigen heavy chain (4F2hc)                                                              | SLC3A2             | 0.02            | 1.02 ↑      |
| P38646      | Stress-70 protein (Heat shock 70 kDa protein 9)                                                           | HSPA9              | 0.02            | 1.01 ↑      |
| P49756      | RNA-binding protein 25                                                                                    | RBM25              | 0.02            | 1.03 ↑      |

| <b>Protein IDs</b> | <b>Protein Names</b>                                              | <b>Gene IDs</b> | <b><i>p</i>-value</b> | <b>Fold Change</b> |
|--------------------|-------------------------------------------------------------------|-----------------|-----------------------|--------------------|
| Q13501             | Sequestosome-1 (EBI3-associated protein of 60 kDa) (EBIAP) (p60)  | SQSTM1          | 0.02                  | 1.03 ↑             |
| Q9P0L0             | Vesicle-associated membrane protein-associated protein A (VAMP-A) | VAPA<br>VAP33   | 0.02                  | 1.01 ↑             |
| Q9P258             | Protein RCC2 (RCC1-like protein TD-60)                            | RCC2            | 0.02                  | 1.01 ↑             |
| P52597             | Heterogeneous nuclear ribonucleoprotein F (hnRNP F)               | HNRNPF<br>HNRPF | 0.02                  | 1.02 ↑             |
| P34897             | Serine hydroxymethyltransferase (SHMT)                            | SHMT2           | 0.02                  | 1.01 ↑             |
| Q96T88             | E3 ubiquitin-protein ligase UHRF1                                 | UHRF1           | 0.02                  | 1.02 ↑             |
| Q13838             | Spliceosome RNA helicase DDX39B                                   | DDX39B          | 0.01                  | 1.00 ↑             |
| P23526             | Adenosylhomocysteinase (AdoHcyase)                                | AHCY            | 0.01                  | 1.01 ↑             |
| P02545             | Prelamin-A/C                                                      | LMNA            | 0.01                  | 1.01 ↑             |
| P04216             | Thy-1 membrane glycoprotein                                       | THY1            | 0.006                 | 1.02 ↑             |
| P05413             | Fatty acid-binding protein                                        | FABP3           | 0.004                 | 1.03 ↑             |
| P37837             | Transaldolase                                                     | TALDO1          | 0.004                 | 1.02 ↑             |
| P35232             | Prohibitin                                                        | PHB             | 0.002                 | 1.01 ↑             |

**Table S5.** List of altered proteins in U118 cells versus Control, after treatment with 0.5  $\mu$ M ST1926 for 48 hours. A total of 136 proteins with significant changes (53 downregulated (↓) and 83 upregulated (↑)) were identified in U118 cells with  $p < 0.05$ .

| Protein IDs | Protein Names                                                                                                            | Gene IDs | <i>p</i> -value | Fold Change |
|-------------|--------------------------------------------------------------------------------------------------------------------------|----------|-----------------|-------------|
| P04181      | Ornithine aminotransferase, mitochondrial                                                                                | OAT      | 0.001           | 0.98 ↓      |
| P40763      | Signal transducer and activator of transcription 3                                                                       | STAT3    | 0.002           | 0.98 ↓      |
| P12109      | Collagen alpha-1(VI) chain                                                                                               | CO6A1    | 0.003           | 0.98 ↓      |
| Q09666      | Neuroblast differentiation-associated protein AHNAK                                                                      | AHNAK    | 0.004           | 0.99 ↓      |
| P06753      | Tropomyosin alpha-3 chain                                                                                                | TPM3     | 0.004           | 0.98 ↓      |
| Q6UVK1      | Chondroitin sulfate proteoglycan 4                                                                                       | CSPG4    | 0.004           | 0.98 ↓      |
| P40227      | T-complex protein 1 subunit zeta (TCP-1-zeta)                                                                            | TCPZ     | 0.006           | 0.98 ↓      |
| Q7Z4H8      | Protein O-glucosyltransferase 3                                                                                          | PLGT3    | 0.006           | 0.99 ↓      |
| Q13185      | Chromobox protein homolog 3                                                                                              | CBX3     | 0.007           | 0.97 ↓      |
| Q8NBT2      | Kinetochore protein Spc24                                                                                                | SPC24    | 0.008           | 0.95 ↓      |
| Q9P2E9      | Ribosome-binding protein 1                                                                                               | RRBP1    | 0.009           | 0.98 ↓      |
| P12111      | Collagen alpha-3 (VI) chain                                                                                              | CO6A3    | 0.009           | 0.95 ↓      |
| O00571      | ATP-dependent RNA helicase DDX3X                                                                                         | DDX3X    | 0.01            | 0.98 ↓      |
| P15144      | Aminopeptidase N (AP-N)                                                                                                  | AMPN     | 0.01            | 0.99 ↓      |
| Q96QK1      | Vacuolar protein sorting-associated protein 35 (hVPS35)                                                                  | VPS35    | 0.01            | 0.99 ↓      |
| Q6YHK3      | CD109 antigen                                                                                                            | CD109    | 0.01            | 0.96 ↓      |
| Q14980      | Nuclear mitotic apparatus protein 1                                                                                      | NUMA1    | 0.01            | 0.99 ↓      |
| Q5SSJ5      | Heterochromatin protein 1-binding protein 3                                                                              | HP1B3    | 0.02            | 0.98 ↓      |
| Q99685      | Monoglyceride lipase (MGL)                                                                                               | MGLL     | 0.02            | 0.99 ↓      |
| Q9BUF5      | Tubulin beta-6 chain (Tubulin beta class V)                                                                              | TBB6     | 0.02            | 0.97 ↓      |
| P53618      | Coatomer subunit beta                                                                                                    | COPB     | 0.02            | 0.98 ↓      |
| P26358      | DNA (cytosine-5)-methyltransferase 1 (Dnmt1)                                                                             | DNMT1    | 0.02            | 0.96 ↓      |
| Q7L1Q6      | eIF5-mimic protein 2                                                                                                     | BZW1     | 0.02            | 0.98 ↓      |
| P48643      | T-complex protein 1 subunit epsilon (TCP-1-epsilon)                                                                      | TCPE     | 0.02            | 0.99 ↓      |
| P13010      | X-ray repair cross-complementing protein 5                                                                               | XRCC5    | 0.02            | 0.99 ↓      |
| O00186      | Syntaxin-binding protein 3                                                                                               | STXB3    | 0.02            | 0.98 ↓      |
| P04899      | Guanine nucleotide-binding protein G(i) subunit alpha-2                                                                  | GNAI2    | 0.02            | 0.98 ↓      |
| Q07666      | KH domain-containing, RNA-binding, signal transduction-associated protein 1 (GAP-associated tyrosine phosphoprotein p62) | KHDR1    | 0.02            | 0.95 ↓      |
| Q96TA1      | Protein Niban 2                                                                                                          | NIBL1    | 0.02            | 0.97 ↓      |

| Protein IDs | Protein Names                                                              | Gene IDs | <i>p</i> -value | Fold Change |
|-------------|----------------------------------------------------------------------------|----------|-----------------|-------------|
| P12956      | X-ray repair cross-complementing protein 6                                 | XRCC6    | 0.02            | 0.98 ↓      |
| Q9Y3A5      | Ribosome maturation protein SBDS                                           | SBDS     | 0.02            | 0.99 ↓      |
| P80303      | Nucleobindin-2                                                             | NUCB2    | 0.02            | 0.96 ↓      |
| P42224      | Signal transducer and activator of transcription 1-alpha/beta              | STAT1    | 0.02            | 0.98 ↓      |
| O75534      | Cold shock domain-containing protein E1                                    | CSDE1    | 0.03            | 0.99 ↓      |
| Q9BW60      | Elongation of very long chain fatty acids protein 1                        | ELOV1    | 0.03            | 0.98 ↓      |
| O75506      | Heat shock factor-binding protein 1                                        | HSBP1    | 0.03            | 0.95 ↓      |
| P11388      | DNA topoisomerase 2-alpha                                                  | TOP2A    | 0.03            | 0.92 ↓      |
| Q01082      | Spectrin beta chain, non-erythrocytic 1                                    | SPTB2    | 0.03            | 0.99 ↓      |
| O14579      | Coatomer subunit epsilon                                                   | COPE     | 0.03            | 0.98 ↓      |
| Q9UHD8      | Septin-9                                                                   | SEPT9.   | 0.03            | 0.98 ↓      |
| O60568      | Multifunctional procollagen lysine hydroxylase and glycosyltransferase LH3 | PLOD3    | 0.03            | 0.97 ↓      |
| P52292      | Importin subunit alpha-1                                                   | IMA1     | 0.04            | 0.87 ↓      |
| P13639      | Elongation factor 2 (EF-2)                                                 | EF2      | 0.04            | 0.99 ↓      |
| P02751      | Fibronectin (FN)                                                           | FINC     | 0.04            | 0.91 ↓      |
| P52209      | 6-phosphogluconate dehydrogenase, decarboxylating                          | 6PGD     | 0.04            | 0.99 ↓      |
| Q9UH99      | SUN domain-containing protein 2                                            | SUN2     | 0.04            | 0.96 ↓      |
| Q9Y5K5      | Ubiquitin carboxyl-terminal hydrolase isozyme L5 (UCH-L5)                  | UCHL5    | 0.04            | 0.99 ↓      |
| P07711      | Procathepsin L                                                             | CATL1    | 0.04            | 0.95 ↓      |
| O94925      | Glutaminase kidney isoform, mitochondrial (GLS)                            | GLSK     | 0.04            | 0.99 ↓      |
| Q9NR30      | Nucleolar RNA helicase 2                                                   | DDX21    | 0.04            | 0.98 ↓      |
| P24752      | Acetyl-CoA acetyltransferase, mitochondrial                                | THIL     | 0.04            | 0.99 ↓      |
| P17844      | Probable ATP-dependent RNA helicase DDX5                                   | DDX5     | 0.04            | 0.98 ↓      |
| P47756      | F-actin-capping protein subunit beta (CapZ beta)                           | CAPZB    | 0.04            | 0.99 ↓      |
| Q92841      | Probable ATP-dependent RNA helicase DDX17                                  | DDX17    | 0.04            | 1.01 ↑      |
| P09960      | Leukotriene A-4 hydrolase (LTA-4 hydrolase)                                | LKHA4    | 0.04            | 1.01 ↑      |
| P39748      | Flap endonuclease 1 (FEN-1)                                                | FEN1     | 0.04            | 1.02 ↑      |
| O43615      | Mitochondrial import inner membrane translocase subunit TIM44              | TIM44    | 0.04            | 1.07 ↑      |
| Q96T88      | E3 ubiquitin-protein ligase UHRF1                                          | UHRF1    | 0.04            | 1.01 ↑      |
| P40938      | Replication factor C subunit 3                                             | RFC3     | 0.04            | 1.01 ↑      |
| Q92878      | DNA repair protein RAD50 (hRAD50)                                          | RAD50    | 0.04            | 1.01 ↑      |

| Protein IDs | Protein Names                                                     | Gene IDs | <i>p</i> -value | Fold Change |
|-------------|-------------------------------------------------------------------|----------|-----------------|-------------|
| Q13838      | Spliceosome RNA helicase DDX39B                                   | DX39B    | 0.04            | 1.01 ↑      |
| P38117      | Electron transfer flavoprotein subunit beta (Beta-ETF)            | ETFB     | 0.04            | 1.02 ↑      |
| P53992      | Protein transport protein Sec24C                                  | SC24C    | 0.04            | 1.01 ↑      |
| Q9NZB2      | Constitutive coactivator of PPAR-gamma-like protein 1             | F120A    | 0.04            | 1.02 ↑      |
| P11940      | Polyadenylate-binding protein 1 (PABP-1)                          | PABP1    | 0.04            | 1.01 ↑      |
| Q12888      | TP53-binding protein 1 (53BP1) (p53-binding protein 1)            | TP53B    | 0.04            | 1.01 ↑      |
| Q14103      | Heterogeneous nuclear ribonucleoprotein D0 (hnRNP D0)             | HNRPD    | 0.04            | 1.01 ↑      |
| P30086      | Phosphatidylethanolamine-binding protein 1 (PEBP-1)               | PEBP1    | 0.03            | 1.01 ↑      |
| O75369      | Filamin-B (FLN-B)                                                 | FLNB     | 0.03            | 1.01 ↑      |
| P31153      | S-adenosylmethionine synthase isoform type-2 (AdoMet synthase 2)  | METK2    | 0.03            | 1.02 ↑      |
| P45880      | Voltage-dependent anion-selective channel protein 2 (VDAC-2)      | VDAC2    | 0.03            | 1.01 ↑      |
| P50416      | Carnitine O-palmitoyltransferase 1, liver isoform (CPT1-L)        | CPT1A    | 0.03            | 1.01 ↑      |
| Q9Y3E5      | Peptidyl-tRNA hydrolase 2, mitochondrial (PTH 2)                  | PTH2     | 0.03            | 1.02 ↑      |
| P30041      | Peroxioredoxin-6                                                  | PRDX6    | 0.03            | 1.02 ↑      |
| P51659      | Peroxisomal multifunctional enzyme type 2 (MFE-2)                 | DHB4     | 0.03            | 1.02 ↑      |
| P11413      | Glucose-6-phosphate 1-dehydrogenase (G6PD)                        | G6PD     | 0.03            | 1.02 ↑      |
| P18859      | ATP synthase-coupling factor 6, mitochondrial (ATPase subunit F6) | ATP5J    | 0.03            | 1.02 ↑      |
| P22307      | Sterol carrier protein 2 (SCP-2)                                  | NLTP     | 0.03            | 1.02 ↑      |
| O43175      | D-3-phosphoglycerate dehydrogenase (3-PGDH)                       | SERA     | 0.03            | 1.02 ↑      |
| P21796      | Voltage-dependent anion-selective channel protein 1 (VDAC-1)      | VDAC1    | 0.03            | 1.01 ↑      |
| Q93052      | Lipoma-preferred partner                                          | LPP      | 0.03            | 1.02 ↑      |
| Q9BV86      | N-terminal Xaa-Pro-Lys N-methyltransferase 1                      | NTM1A    | 0.03            | 1.02 ↑      |
| Q92945      | Far upstream element-binding protein 2                            | FUBP2    | 0.03            | 1.02 ↑      |
| O43592      | Exportin-T                                                        | XPOT     | 0.03            | 1.02 ↑      |
| P36776      | Lon protease homolog, mitochondrial                               | LONM     | 0.03            | 1.01 ↑      |
| P33992      | DNA replication licensing factor MCM5                             | MCM5     | 0.03            | 1.02 ↑      |
| P23284      | Peptidyl-prolyl cis-trans isomerase B (PPIase B)                  | PPIB     | 0.03            | 1.02 ↑      |
| Q9P258      | Protein RCC2 (RCC1-like protein TD-60)                            | RCC2     | 0.02            | 1.01 ↑      |

| Protein IDs | Protein Names                                                                          | Gene IDs | p-value | Fold Change |
|-------------|----------------------------------------------------------------------------------------|----------|---------|-------------|
| P14314      | Glucosidase 2 subunit beta (80K-H protein)                                             | GLU2B    | 0.02    | 1.01 ↑      |
| P60174      | Triosephosphate isomerase (TIM)                                                        | TPIS     | 0.02    | 1.01 ↑      |
| P54577      | Tyrosine--tRNA ligase, cytoplasmic                                                     | SYYC     | 0.02    | 1.01 ↑      |
| P16152      | Carbonyl reductase [NADPH] 1                                                           | CBR1     | 0.02    | 1.01 ↑      |
| Q16543      | Hsp90 co-chaperone Cdc37 (Hsp90 chaperone protein kinase-targeting subunit) (p50Cdc37) | CDC37    | 0.02    | 1.01 ↑      |
| P55084      | Trifunctional enzyme subunit beta, mitochondrial (TP-beta)                             | ECHB     | 0.02    | 1.01 ↑      |
| Q9UQ80      | Proliferation-associated protein 2G4 (Cell cycle protein p38-2G4 homolog) (hG4-1)      | PA2G4    | 0.02    | 1.01 ↑      |
| P21980      | Protein-glutamine gamma-glutamyltransferase 2                                          | TGM2     | 0.02    | 1.04 ↑      |
| P04083      | Annexin A1 (Annexin I)                                                                 | ANXA1    | 0.02    | 1.01 ↑      |
| O95831      | Apoptosis-inducing factor 1, mitochondrial                                             | AIFM1    | 0.02    | 1.02 ↑      |
| Q14566      | DNA replication licensing factor MCM6                                                  | MCM6     | 0.02    | 1.02 ↑      |
| Q05682      | Caldesmon (CDM)                                                                        | CALD1    | 0.02    | 1.03 ↑      |
| O75340      | Programmed cell death protein 6 (Apoptosis-linked gene 2 protein homolog) (ALG-2)      | PDCD6    | 0.02    | 1.02 ↑      |
| P29401      | Transketolase (TK)                                                                     | TKT      | 0.02    | 1.01 ↑      |
| P62633      | CCHC-type zinc finger nucleic acid binding protein                                     | CNBP     | 0.01    | 1.02 ↑      |
| Q08211      | ATP-dependent RNA helicase A                                                           | DHX9     | 0.01    | 1.01 ↑      |
| P30043      | Flavin reductase (NADPH) (FR)                                                          | BLVRB    | 0.01    | 1.04 ↑      |
| P32119      | Peroxiredoxin-2                                                                        | PRDX2    | 0.01    | 1.02 ↑      |
| P05387      | Large ribosomal subunit protein P2                                                     | RLA2     | 0.01    | 1.01 ↑      |
| P07602      | Prosaposin (Proactivator polypeptide)                                                  | SAP      | 0.01    | 1.01 ↑      |
| Q16527      | Cysteine and glycine-rich protein 2 (Cysteine-rich protein 2) (CRP2)                   | CSRP2    | 0.01    | 1.06 ↑      |
| P46459      | Vesicle-fusing ATPase                                                                  | NSF      | 0.01    | 1.01 ↑      |
| P11021      | Endoplasmic reticulum chaperone BiP                                                    | BIP      | 0.01    | 1.02 ↑      |
| P29692      | Elongation factor 1-delta (EF-1-delta)                                                 | EF1D     | 0.009   | 1.01 ↑      |
| O94979      | Protein transport protein Sec31A (ABP125)                                              | SC31A    | 0.008   | 1.02 ↑      |
| P54819      | Adenylate kinase 2, mitochondrial (AK 2)                                               | KAD2     | 0.008   | 1.02 ↑      |
| Q13011      | Delta(3,5)-Delta(2,4)-dienoyl-CoA isomerase, mitochondrial                             | ECH1     | 0.007   | 1.02 ↑      |
| Q14192      | Four and a half LIM domains protein 2 (FHL-2)                                          | FHL2     | 0.007   | 1.03 ↑      |
| P68366      | Tubulin alpha-4A chain                                                                 | TBA4A    | 0.006   | 1.02 ↑      |
| P09972      | Fructose-bisphosphate aldolase C (Brain-type aldolase)                                 | ALDOC    | 0.006   | 1.02 ↑      |

| Protein IDs | Protein Names                                                                                                     | Gene IDs | <i>p</i> -value | Fold Change |
|-------------|-------------------------------------------------------------------------------------------------------------------|----------|-----------------|-------------|
| Q9BRA2      | Thioredoxin domain-containing protein 17 (14 kDa thioredoxin-related protein) (TRP14)                             | TXD17    | 0.006           | 1.03 ↑      |
| O75396      | Vesicle-trafficking protein SEC22b (ER-Golgi SNARE of 24 kDa) (ERS-24)                                            | SC22B    | 0.005           | 1.03 ↑      |
| O75533      | Splicing factor 3B subunit 1 (Pre-mRNA-splicing factor SF3b 155 kDa subunit) (SF3b155)                            | SF3B1    | 0.005           | 1.01 ↑      |
| P04216      | Thy-1 membrane glycoprotein (CDw90)                                                                               | THY1     | 0.005           | 1.01 ↑      |
| O43396      | Thioredoxin-like protein 1 (32 kDa thioredoxin-related protein)                                                   | TXNL1    | 0.004           | 1.01 ↑      |
| Q15459      | Splicing factor 3A subunit 1 (SF3a120)                                                                            | SF3A1    | 0.004           | 1.02 ↑      |
| A0A0U1RRL7  | Protein MMP24OS (MMP24 opposite strand)                                                                           | MMPOS    | 0.003           | 1.02 ↑      |
| P38646      | Stress-70 protein, mitochondrial (75 kDa glucose-regulated protein) (GRP-75)                                      | GRP75    | 0.003           | 1.01 ↑      |
| Q13501      | Sequestosome-1 (Ubiquitin-binding protein p62)                                                                    | SQSTM    | 0.003           | 1.04 ↑      |
| P40925      | Malate dehydrogenase, cytoplasmic                                                                                 | MDHC     | 0.002           | 1.01 ↑      |
| P37837      | Transaldolase                                                                                                     | TALDO    | 0.002           | 1.02 ↑      |
| P02545      | Prelamin-A/C [Cleaved into: Lamin-A/C (70 kDa lamin) (Renal carcinoma antigen NY-REN-32)]                         | LMNA     | 0.002           | 1.01 ↑      |
| P48637      | Glutathione synthetase (GSH synthetase) (GSH-S)                                                                   | GSHB     | 0.002           | 1.03 ↑      |
| P05413      | Fatty acid-binding protein, heart (Fatty acid-binding protein 3) (Heart-type fatty acid-binding protein) (H-FABP) | FABPH    | 0.001           | 1.03 ↑      |
| P40926      | Malate dehydrogenase, mitochondrial                                                                               | MDHM     | 0.001           | 1.01 ↑      |
| P08195      | 4F2 cell-surface antigen heavy chain (4F2hc)                                                                      | 4F2      | 0.0007          | 1.04 ↑      |
| O95817      | BAG family molecular chaperone regulator 3 (BAG-3)                                                                | BAG3     | 0.0004          | 1.04 ↑      |
| Q8N6T3      | ADP-ribosylation factor GTPase-activating protein 1 (ARF GAP 1)                                                   | ARFG1    | 0.0003          | 1.03 ↑      |



**Table S6.** List of altered proteins in U87MG cells versus Control, after treatment with 0.5  $\mu$ M ST1926 for 2 hours. A total of 115 proteins with significant changes (61 downregulated (↓) and 54 upregulated (↑)) were identified in U87MG cells with  $p < 0.05$ .

| Protein IDs | Protein Names                                           | Gene IDs           | <i>p</i> -value | Fold Change |
|-------------|---------------------------------------------------------|--------------------|-----------------|-------------|
| P06737      | Glycogen phosphorylase                                  | PYGL               | 0.0002          | 0.98 ↓      |
| P56192      | Methionine--tRNA ligase                                 | MARS1              | 0.0003          | 0.99 ↓      |
| P12956      | X-ray repair cross-complementing protein 6              | XRCC6              | 0.0004          | 0.99 ↓      |
| P46940      | Ras GTPase-activating-like protein IQGAP1 (p195)        | IQGAP1<br>KIAA0051 | 0.0004          | 0.99 ↓      |
| P04040      | Catalase                                                | CAT                | 0.0005          | 0.98 ↓      |
| P09382      | Galectin-1 (Gal-1)                                      | LGALS1             | 0.0005          | 0.98 ↓      |
| P29966      | Myristoylated alanine-rich C-kinase substrate           | MARCKS             | 0.0008          | 0.98 ↓      |
| P07196      | Neurofilament light polypeptide (NF-L)                  | NEFL               | 0.001           | 0.98 ↓      |
| P14625      | Endoplasmic                                             | HSP90B1            | 0.002           | 0.99 ↓      |
| O75369      | Filamin-B (FLN-B)                                       | FLNB               | 0.003           | 0.99 ↓      |
| Q8NBS9      | Thioredoxin domain-containing protein 5                 | TXNDC5             | 0.004           | 0.99 ↓      |
| P49327      | Fatty acid synthase                                     | FASN/ FAS          | 0.004           | 0.99 ↓      |
| P13667      | Protein disulfide-isomerase A4                          | PDIA4              | 0.005           | 0.98 ↓      |
| O00469      | Procollagen-lysine,2-oxoglutarate 5-dioxygenase 2       | PLOD2              | 0.005           | 0.99 ↓      |
| P27797      | Calreticulin (CRP55) (Calregulin)                       | CALR               | 0.006           | 0.99 ↓      |
| Q58FF8      | Putative heat shock protein HSP 90-beta                 | HSP90AB2<br>P      | 0.007           | 0.98 ↓      |
| P05455      | Lupus La protein                                        | SSB                | 0.008           | 0.98 ↓      |
| P55735      | Protein SEC13 homolog                                   | SEC13              | 0.009           | 0.99 ↓      |
| P39748      | Flap endonuclease 1 (FEN-1)                             | FEN1<br>RAD2       | 0.009           | 0.98 ↓      |
| P04899      | Guanine nucleotide-binding protein G(i) subunit alpha-2 | GNAI2<br>GNAI2B    | 0.01            | 0.98 ↓      |
| P61978      | Heterogeneous nuclear ribonucleoprotein K (hnRNP K)     | HNRNPK<br>HNRPK    | 0.01            | 0.99 ↓      |
| P13010      | X-ray repair cross-complementing protein 5              | XRCC5              | 0.01            | 0.99 ↓      |
| P22234      | Multifunctional protein ADE2                            | PAICS<br>ADE2      | 0.01            | 0.99 ↓      |
| P49915      | GMP synthase                                            | GMPS               | 0.01            | 0.99 ↓      |
| Q9Y2W1      | Thyroid hormone receptor-associated protein 3           | THRAP3             | 0.02            | 0.98 ↓      |
| O15427      | Monocarboxylate transporter 4 (MCT 4)                   | SLC16A3<br>MCT4    | 0.02            | 0.98 ↓      |
| Q00610      | Clathrin heavy chain 1                                  | CLTC               | 0.02            | 0.99 ↓      |
| P29401      | Transketolase (TK)                                      | TKT                | 0.02            | 0.98 ↓      |

| <b>Protein IDs</b> | <b>Protein Names</b>                                                                       | <b>Gene IDs</b>  | <b><i>p</i>-value</b> | <b>Fold Change</b> |
|--------------------|--------------------------------------------------------------------------------------------|------------------|-----------------------|--------------------|
| P63208             | S-phase kinase-associated protein 1                                                        | SKP1             | 0.02                  | 0.99 ↓             |
| Q86UP2             | Kinectin                                                                                   | KTN1             | 0.02                  | 0.99 ↓             |
| P26583             | High mobility group protein B2 (HMG-2)                                                     | HMGB2<br>HMG2    | 0.02                  | 0.97 ↓             |
| P07237             | Protein disulfide-isomerase (PDI)                                                          | PDI              | 0.02                  | 0.99 ↓             |
| Q7KZF4             | Staphylococcal nuclease domain-containing protein 1                                        | SND1<br>TDRD11   | 0.02                  | 0.99 ↓             |
| P08621             | U1 small nuclear ribonucleoprotein 70 kDa                                                  | SNRNP70          | 0.02                  | 0.99 ↓             |
| Q16531             | DNA damage-binding protein 1                                                               | DDB1             | 0.03                  | 0.99 ↓             |
| P43307             | Translocon-associated protein subunit alpha (TRAP-alpha)                                   | SSR1<br>TRAPA    | 0.03                  | 0.99 ↓             |
| O94906             | Pre-mRNA-processing factor 6                                                               | PRPF6            | 0.03                  | 0.99 ↓             |
| P30419             | Glycylpeptide N-tetradecanoyltransferase 1                                                 | NMT1             | 0.03                  | 0.96 ↓             |
| P49321             | Nuclear autoantigenic sperm protein (NASP)                                                 | NASP             | 0.03                  | 0.99 ↓             |
| P84077             | ADP-ribosylation factor 1                                                                  | ARF1             | 0.03                  | 0.99 ↓             |
| P50454             | Serpin family H member 1                                                                   | SERPINH1         | 0.04                  | 0.99 ↓             |
| Q13442             | 28 kDa heat- and acid-stable phosphoprotein (PDGF-associated protein) (PAP)                | PDAP1<br>HASPP28 | 0.04                  | 0.98 ↓             |
| P62873             | Guanine nucleotide-binding protein G(I)/G(S)/G(T) subunit beta-1 (Transducin beta chain 1) | GNB1             | 0.04                  | 0.98 ↓             |
| P09543             | 2',3'-cyclic-nucleotide 3'-phosphodiesterase                                               | CNP              | 0.04                  | 0.98 ↓             |
| P31040             | Succinate dehydrogenase [ubiquinone] flavoprotein subunit                                  | SDHA             | 0.04                  | 0.98 ↓             |
| O75947             | ATP synthase subunit d                                                                     | ATP5PD           | 0.04                  | 0.96 ↓             |
| P27816             | Microtubule-associated protein 4 (MAP-4)                                                   | MAP4             | 0.04                  | 0.98 ↓             |
| P27824             | Calnexin                                                                                   | CANX             | 0.04                  | 0.99 ↓             |
| O43852             | Calumenin                                                                                  | CALU             | 0.04                  | 0.99 ↓             |
| P39687             | Acidic leucine-rich nuclear phosphoprotein 32 family member A                              | ANP32A           | 0.04                  | 0.98 ↓             |
| P09874             | Poly [ADP-ribose] polymerase 1 (PARP-1)                                                    | PARP1            | 0.04                  | 0.99 ↓             |
| P11047             | Laminin subunit gamma-1                                                                    | LAMB2            | 0.04                  | 0.98 ↓             |
| P50990             | T-complex protein 1 subunit theta (TCP-1-theta)                                            | CCT8<br>CCTQ     | 0.04                  | 0.99 ↓             |
| P11717             | Cation-independent mannose-6-phosphate receptor (CI Man-6-P receptor)                      | IGF2R<br>MPRI    | 0.04                  | 0.99 ↓             |
| P14866             | Heterogeneous nuclear ribonucleoprotein L (hnRNP L)                                        | HNRNPL<br>HNRPL  | 0.04                  | 0.99 ↓             |
| O75390             | Citrate synthase                                                                           | CS               | 0.040                 | 0.99 ↓             |
| O95573             | Long-chain-fatty-acid--CoA ligase 3                                                        | ACSL3            | 0.04                  | 0.98 ↓             |

| Protein IDs | Protein Names                                                              | Gene IDs          | <i>p</i> -value | Fold Change |
|-------------|----------------------------------------------------------------------------|-------------------|-----------------|-------------|
| P07910      | Heterogeneous nuclear ribonucleoproteins C1/C2                             | HNRNPC            | 0.04            | 0.99 ↓      |
| P28066      | Proteasome subunit alpha type-5                                            | PSMA5             | 0.04            | 0.99 ↓      |
| P63241      | Eukaryotic translation initiation factor 5A-1 (eIF-5A-1)                   | EIF5A             | 0.04            | 0.99 ↓      |
| Q02809      | Procollagen-lysine,2-oxoglutarate 5-dioxygenase 1                          | PLOD1<br>LLH      | 0.04            | 0.98 ↓      |
| Q96RP9      | Elongation factor G                                                        | GFM1              | 0.04            | 1.02 ↑      |
| Q01081      | Splicing factor U2AF 35 kDa subunit                                        | U2AF1             | 0.04            | 1.02 ↑      |
| P15880      | 40S ribosomal protein S2                                                   | RPS2              | 0.04            | 1.01 ↑      |
| Q96T88      | E3 ubiquitin-protein ligase UHRF1                                          | UHRF1             | 0.04            | 1.02 ↑      |
| P04792      | Heat shock protein beta-1 (HspB1)                                          | HSPB1             | 0.04            | 1.02 ↑      |
| P60842      | Eukaryotic initiation factor 4A-I (eIF-4A-I)                               | EIF4A1            | 0.04            | 1.01 ↑      |
| P18124      | 60S ribosomal protein L7                                                   | RPL7              | 0.04            | 1.03 ↑      |
| P68366      | Tubulin alpha-4A chain                                                     | TUBA4A            | 0.04            | 1.03 ↑      |
| Q01844      | RNA-binding protein EWS                                                    | EWSR1             | 0.04            | 1.01 ↑      |
| Q07955      | Serine/arginine-rich splicing factor 1                                     | SRSF1             | 0.04            | 1.02 ↑      |
| Q8N1F7      | Nuclear pore complex protein Nup93                                         | NUP93             | 0.04            | 1.01 ↑      |
| P24928      | DNA-directed RNA polymerase II subunit RPB1 (RNA polymerase II subunit B1) | POLR2A<br>POLR2   | 0.04            | 1.01 ↑      |
| P05386      | 60S acidic ribosomal protein P1                                            | RPLP1             | 0.04            | 1.01 ↑      |
| P42677      | 40S ribosomal protein S27                                                  | RPS27             | 0.03            | 1.02 ↑      |
| P62241      | 40S ribosomal protein S8                                                   | RPS8              | 0.03            | 1.01 ↑      |
| P17655      | Calpain-2 catalytic subunit                                                | CAPN2             | 0.03            | 1.02 ↑      |
| Q13151      | Heterogeneous nuclear ribonucleoprotein A0 (hnRNP A0)                      | HNRNPA0<br>HNRPA0 | 0.03            | 1.02 ↑      |
| P41567      | Eukaryotic translation initiation factor 1 (eIF1)                          | EIF1              | 0.03            | 1.08 ↑      |
| Q16186      | Proteasomal ubiquitin receptor ADRM1                                       | ADRM1             | 0.03            | 1.04 ↑      |
| P26038      | Moesin (Membrane-organizing extension spike protein)                       | MSN               | 0.03            | 1.01 ↑      |
| Q13200      | 26S proteasome non-ATPase regulatory subunit 2                             | PSMD2<br>TRAP2    | 0.03            | 1.01 ↑      |
| P02786      | Transferrin receptor protein 1 (TfR1)                                      | TFRC              | 0.03            | 1.02 ↑      |
| O94925      | Glutaminase kidney isoform (GLS)/ (K-glutaminase)                          | GLS<br>GLS1       | 0.03            | 1.02 ↑      |
| Q9H0A0      | RNA cytidine acetyltransferase                                             | NAT10             | 0.02            | 1.02 ↑      |
| Q04637      | Eukaryotic translation initiation factor 4 gamma 1 (eIF-4-gamma 1)         | EIF4G1            | 0.02            | 1.02 ↑      |
| Q16543      | Hsp90 co-chaperone Cdc37                                                   | CDC37             | 0.02            | 1.01 ↑      |
| O43396      | Thioredoxin-like protein 1                                                 | TXNL1             | 0.02            | 1.02 ↑      |

| <b>Protein IDs</b> | <b>Protein Names</b>                                             | <b>Gene IDs</b> | <b><i>p</i>-value</b> | <b>Fold Change</b> |
|--------------------|------------------------------------------------------------------|-----------------|-----------------------|--------------------|
| P10644             | cAMP-dependent protein kinase type I-alpha regulatory subunit    | PRKAR1A         | 0.02                  | 1.02 ↑             |
| P40222             | Alpha-taxilin                                                    | TXLNA           | 0.02                  | 1.01 ↑             |
| Q9NR30             | Nucleolar RNA helicase 2 (DEAD box protein 21)                   | DDX21           | 0.01                  | 1.02 ↑             |
| Q5JTH9             | RRP12-like protein                                               | RRP12           | 0.01                  | 1.03 ↑             |
| P46781             | 40S ribosomal protein S9                                         | RPS9            | 0.01                  | 1.01 ↑             |
| Q02878             | 60S ribosomal protein L6                                         | RPL6            | 0.01                  | 1.02 ↑             |
| Q9NYF8             | Bcl-2-associated transcription factor 1 (Btf)                    | BCLAF1          | 0.009                 | 1.02 ↑             |
| P31937             | 3-hydroxyisobutyrate dehydrogenase                               | HIBADH          | 0.008                 | 1.01 ↑             |
| P61221             | ATP-binding cassette sub-family E member 1                       | ABCE1           | 0.005                 | 1.01 ↑             |
| Q13501             | Sequestosome-1 (EBI3-associated protein of 60 kDa) (EBIAP) (p60) | SQSTM1          | 0.005                 | 1.05 ↑             |
| Q08J23             | RNA cytosine C(5)-methyltransferase NSUN2                        | NSUN2           | 0.005                 | 1.04 ↑             |
| Q92598             | Heat shock protein 105 kDa                                       | HSPH1<br>HSP105 | 0.005                 | 1.01 ↑             |
| Q8TDN6             | Ribosome biogenesis protein BRX1 homolog                         | BRIX1           | 0.005                 | 1.02 ↑             |
| Q9UMX0             | Ubiquilin-1                                                      | UBQLN1          | 0.005                 | 1.03 ↑             |
| Q07960             | Rho GTPase-activating protein 1                                  | ARHGAP1         | 0.005                 | 1.02 ↑             |
| Q02543             | 60S ribosomal protein L18a                                       | RPL18A          | 0.005                 | 1.02 ↑             |
| Q15942             | Zyxin (Zyxin-2)                                                  | ZYX             | 0.004                 | 1.07 ↑             |
| P35268             | 60S ribosomal protein L22                                        | RPL22           | 0.004                 | 1.01 ↑             |
| O15355             | Protein phosphatase 1G                                           | PPM1G           | 0.004                 | 1.01 ↑             |
| P50914             | 60S ribosomal protein L14                                        | RPL14           | 0.004                 | 1.02 ↑             |
| P46060             | Ran GTPase-activating protein 1 (RanGAP1)                        | RANGAP1         | 0.003                 | 1.02 ↑             |
| P17844             | Probable ATP-dependent RNA helicase DDX5 (DEAD box protein 5)    | DDX5            | 0.002                 | 1.02 ↑             |
| Q92945             | Far upstream element-binding protein 2 (FUSE-binding protein 2)  | KHSRP<br>FUBP2  | 0.002                 | 1.01 ↑             |
| Q86TG7             | Retrotransposon-derived protein PEG10                            | PEG10           | 0.001                 | 1.04 ↑             |
| P09493             | Tropomyosin alpha-1 chain                                        | TPM1            | 0.0007                | 1.04 ↑             |
| P46087             | Probable 28S rRNA (cytosine(4447)-C (5))-methyltransferase       | NOP2            | 0.0007                | 1.02 ↑             |
| P52292             | Importin subunit alpha-1                                         | KPNA            | 0.0002                | 1.03 ↑             |

**Table S7.** List of altered proteins in U87MG cells versus Control, after treatment with 0.5  $\mu$ M ST1926 for 24 hours. A total of 167 proteins with significant changes (79 downregulated (↓) and 88 upregulated (↑)) were identified in U87MG with  $p < 0.05$ .

| Protein IDs | Protein Names                                                                 | Gene IDs        | <i>p</i> -value | Fold Change |
|-------------|-------------------------------------------------------------------------------|-----------------|-----------------|-------------|
| P07196      | Neurofilament light polypeptide (NF-L)                                        | NEFL            | 0.00001         | 0.97 ↓      |
| Q9P2E9      | Ribosome-binding protein 1                                                    | RRBP1           | 0.00004         | 0.93 ↓      |
| Q58FF8      | Putative heat shock protein HSP 90-beta                                       | HSP90AB2<br>P   | 0.0003          | 0.95 ↓      |
| P14625      | Endoplasmic reticulum chaperone                                               | HSP90B1         | 0.0008          | 0.99 ↓      |
| Q86UP2      | Kinectin                                                                      | KTN1            | 0.0009          | 0.98 ↓      |
| Q08380      | Galectin-3-binding protein (Gal-3BP)                                          | LGALS3BP        | 0.0009          | 0.96 ↓      |
| P12109      | Collagen alpha-1(VI) chain                                                    | COL6A1          | 0.001           | 0.96 ↓      |
| P04899      | Guanine nucleotide-binding protein G(i) subunit alpha-2                       | GNAI2<br>GNAI2B | 0.001           | 0.98 ↓      |
| P46013      | Proliferation marker protein Ki-67                                            | MKI67           | 0.001           | 0.95 ↓      |
| P08621      | U1 small nuclear ribonucleoprotein 70 kDa                                     | SNRNP70         | 0.002           | 0.99 ↓      |
| P63208      | S-phase kinase-associated protein 1                                           | SKP1            | 0.002           | 0.97 ↓      |
| P11717      | Cation-independent mannose-6-phosphate receptor (CI Man-6-P receptor)         | IGF2R<br>MPRI   | 0.002           | 0.99 ↓      |
| Q13443      | A disintegrin and a metalloprotease 9                                         | ADAM9           | 0.002           | 0.94 ↓      |
| Q8NBS9      | Thioredoxin domain-containing protein 5                                       | TXNDC5          | 0.003           | 0.98 ↓      |
| P13667      | Protein disulfide-isomerase A4                                                | PDIA4           | 0.003           | 0.98 ↓      |
| P51114      | Fragile X mental retardation syndrome-related protein 1                       | FXR1            | 0.004           | 0.98 ↓      |
| Q02809      | Procollagen-lysine,2-oxoglutarate 5-dioxygenase 1                             | PLOD1<br>LLH    | 0.004           | 0.96 ↓      |
| P30101      | protein disulfide isomerase family A member 3                                 | PDIA3           | 0.004           | 0.99 ↓      |
| Q7KZF4      | Staphylococcal nuclease domain-containing protein 1                           | SND1<br>TDRD11  | 0.005           | 0.98 ↓      |
| Q92896      | Golgi apparatus protein 1 (CFR-1)                                             | GLG1            | 0.005           | 0.97 ↓      |
| P56192      | Methionine--tRNA ligase                                                       | MARS1           | 0.005           | 0.99 ↓      |
| P28066      | Proteasome subunit alpha type-5                                               | PSMA5           | 0.006           | 0.99 ↓      |
| P05455      | Lupus La protein                                                              | SSB             | 0.006           | 0.98 ↓      |
| P52292      | Importin subunit alpha-1                                                      | KPNA            | 0.006           | 0.99 ↓      |
| P30876      | RNA polymerase II subunit RPB2                                                | POLR2B          | 0.007           | 0.98 ↓      |
| P49327      | Fatty acid synthase                                                           | FASN/ FAS       | 0.008           | 0.99 ↓      |
| Q13263      | Transcription intermediary factor 1-beta                                      | TIF1B           | 0.008           | 0.98 ↓      |
| P39656      | Dolichyl-diphosphooligosaccharide--protein glycosyltransferase 48 kDa subunit | OST48           | 0.009           | 0.99 ↓      |

| Protein IDs | Protein Names                                                                            | Gene IDs        | <i>p</i> -value | Fold Change |
|-------------|------------------------------------------------------------------------------------------|-----------------|-----------------|-------------|
| P40763      | Signal transducer and activator of transcription 3                                       | STAT3<br>APRF   | 0.009           | 0.98 ↓      |
| O60313      | Dynamin-like 120 kDa protein, mitochondrial                                              | OPA1            | 0.01            | 0.97 ↓      |
| O15427      | Monocarboxylate transporter 4 (MCT 4)                                                    | SLC16A3<br>MCT4 | 0.01            | 0.98 ↓      |
| P31946      | 14-3-3 protein beta/alpha (Protein 1054) (Protein kinase C inhibitor protein 1) (KCIP-1) | YWHAB           | 0.01            | 0.99 ↓      |
| P25787      | Proteasome subunit alpha type-2 (PSA2)                                                   | PSMA2           | 0.01            | 0.99 ↓      |
| P29401      | Transketolase (TK)                                                                       | TKT             | 0.01            | 0.99 ↓      |
| P12956      | X-ray repair cross-complementing protein 6                                               | XRCC6           | 0.01            | 0.99 ↓      |
| Q9H3P7      | Golgi resident protein GCP60                                                             | ACBD3           | 0.01            | 0.98 ↓      |
| O00264      | Membrane-associated progesterone receptor component 1 (mPR)                              | PGRMC1          | 0.01            | 0.98 ↓      |
| P13987      | CD59 glycoprotein                                                                        | CD59            | 0.01            | 0.99 ↓      |
| Q2TAY7      | WD40 repeat-containing protein SMU1                                                      | SMU1            | 0.02            | 0.98 ↓      |
| P35606      | Coatomer subunit beta'                                                                   | COPB2           | 0.02            | 0.98 ↓      |
| P12277      | Creatine kinase B-type                                                                   | CKB             | 0.02            | 0.98 ↓      |
| O14617      | AP-3 complex subunit delta-1                                                             | AP3D1           | 0.02            | 0.98 ↓      |
| P13010      | X-ray repair cross-complementing protein 5                                               | XRCC5           | 0.02            | 0.99 ↓      |
| Q8WX93      | Palladin                                                                                 | PALLD           | 0.02            | 0.98 ↓      |
| P09382      | Galectin-1 (Gal-1)                                                                       | LGALS1          | 0.02            | 0.99 ↓      |
| P63092      | Guanine nucleotide-binding protein G(s) subunit alpha isoforms short                     | GNAS<br>GNAS1   | 0.02            | 0.98 ↓      |
| P12004      | Proliferating cell nuclear antigen                                                       | PCNA            | 0.02            | 0.98 ↓      |
| Q16531      | DNA damage-binding protein 1                                                             | DDB1            | 0.02            | 0.99 ↓      |
| P16278      | Beta-galactosidase                                                                       | GLB1            | 0.02            | 0.98 ↓      |
| Q14980      | Nuclear mitotic apparatus protein 1                                                      | NUMA1           | 0.03            | 0.97 ↓      |
| P13804      | Electron transfer flavoprotein subunit alpha, mitochondrial                              | ETF A           | 0.03            | 0.99 ↓      |
| Q1KMD3      | Heterogeneous nuclear ribonucleoprotein U-like protein 2                                 | HNRNPUL<br>2    | 0.03            | 0.99 ↓      |
| P11310      | Medium-chain specific acyl-CoA dehydrogenase, mitochondrial                              | ACADM           | 0.03            | 0.97 ↓      |
| Q15019      | Septin-2                                                                                 | SEPTIN2         | 0.03            | 0.99 ↓      |
| P13674      | Prolyl 4-hydroxylase subunit alpha-1                                                     | P4HA1           | 0.03            | 0.99 ↓      |
| P83916      | Chromobox protein homolog 1 (HP1Hsbeta)                                                  | CBX1            | 0.03            | 0.99 ↓      |
| P52788      | Spermine synthase (SPMSY)                                                                | SMS             | 0.03            | 0.99 ↓      |
| O14980      | Exportin-1 (Exp1)                                                                        | XPO1            | 0.03            | 0.99 ↓      |

| Protein IDs | Protein Names                                                 | Gene IDs        | <i>p</i> -value | Fold Change |
|-------------|---------------------------------------------------------------|-----------------|-----------------|-------------|
| P43307      | Translocon-associated protein subunit alpha (TRAP-alpha)      | SSR1<br>TRAPA   | 0.03            | 0.99 ↓      |
| P39687      | Acidic leucine-rich nuclear phosphoprotein 32 family member A | ANP32A          | 0.03            | 0.98 ↓      |
| Q96HE7      | ERO1-like protein alpha                                       | ERO1A           | 0.04            | 0.98 ↓      |
| Q15155      | Nodal modulator 1                                             | NOMO1           | 0.04            | 0.99 ↓      |
| Q99623      | Prohibitin-2                                                  | PHB2            | 0.04            | 0.99 ↓      |
| Q92499      | ATP-dependent RNA helicase DDX1                               | DDX1            | 0.04            | 0.99 ↓      |
| P30419      | Glycylpeptide N-tetradecanoyltransferase 1                    | NMT1            | 0.04            | 0.99 ↓      |
| Q9Y5L0      | Transportin-3                                                 | TNPO3           | 0.04            | 0.98 ↓      |
| P07237      | Protein disulfide-isomerase (PDI)                             | PDI             | 0.04            | 0.99 ↓      |
| Q9UBG0      | C-type mannose receptor 2                                     | MRC2            | 0.04            | 0.96 ↓      |
| P48735      | Isocitrate dehydrogenase [NADP], mitochondrial                | IDH2            | 0.04            | 0.97 ↓      |
| P11388      | DNA topoisomerase 2-alpha                                     | TOP2A<br>TOP2   | 0.04            | 0.96 ↓      |
| O00469      | Procollagen-lysine,2-oxoglutarate 5-dioxygenase 2             | PLOD2           | 0.04            | 0.98 ↓      |
| P49748      | Very long-chain specific acyl-CoA dehydrogenase               | ACADVL          | 0.04            | 0.99 ↓      |
| P60174      | Triosephosphate isomerase (TIM)                               | TPI1/TPI        | 0.04            | 0.99 ↓      |
| P84077      | ADP-ribosylation factor 1                                     | ARF1            | 0.04            | 0.99 ↓      |
| P35221      | Catenin alpha-1 (Alpha E-catenin)                             | CTNNA1          | 0.04            | 0.99 ↓      |
| P78347      | General transcription factor II-I (GTFII-I)                   | GTF2I           | 0.04            | 0.98 ↓      |
| Q15293      | Reticulocalbin-1                                              | RCN1            | 0.04            | 0.99 ↓      |
| P31689      | DnaJ homolog subfamily A member 1 (DnaJ protein homolog 2)    | DNAJA1<br>DNAJ2 | 0.04            | 0.96 ↓      |
| P11047      | Laminin subunit gamma-1 (Laminin B2 chain)                    | LAMB2           | 0.04            | 0.91 ↓      |
| P04083      | Annexin A1 (Annexin I)                                        | ANXA1           | 0.04            | 1.01 ↑      |
| P62266      | 40S ribosomal protein S23                                     | RPS23           | 0.04            | 1.08 ↑      |
| Q99613      | Eukaryotic translation initiation factor 3 subunit C (eIF3c)  | EIF3C<br>EIF3S8 | 0.04            | 1.02 ↑      |
| Q02952      | A-kinase anchor protein 12 (AKAP-12)                          | AKAP12          | 0.04            | 1.01 ↑      |
| P15880      | 40S ribosomal protein S2                                      | RPS2            | 0.04            | 1.02 ↑      |
| Q13595      | Transformer-2 protein homolog alpha                           | TRA2A           | 0.04            | 1.06 ↑      |
| P23381      | Tryptophan--tRNA ligase                                       | WARS1           | 0.04            | 1.02 ↑      |
| P35268      | 60S ribosomal protein L22                                     | RPL22           | 0.04            | 1.00 ↑      |
| Q9UNZ2      | NSFL1 cofactor p47                                            | NSFL1C          | 0.04            | 1.09 ↑      |
| P63220      | 40S ribosomal protein S21                                     | RPS21           | 0.04            | 1.01 ↑      |



| Protein IDs | Protein Names                                                      | Gene IDs        | <i>p</i> -value | Fold Change |
|-------------|--------------------------------------------------------------------|-----------------|-----------------|-------------|
| Q16543      | Hsp90 co-chaperone Cdc37                                           | CDC37           | 0.04            | 1.01 ↑      |
| P23246      | Splicing factor, proline- and glutamine-rich                       | SFPQ            | 0.04            | 1.02 ↑      |
| P62280      | 40S ribosomal protein S11                                          | RPS11           | 0.04            | 1.02 ↑      |
| Q04637      | Eukaryotic translation initiation factor 4 gamma 1 (eIF-4-gamma 1) | EIF4G1          | 0.04            | 1.01 ↑      |
| Q05682      | Caldesmon                                                          | CALD1           | 0.04            | 1.02 ↑      |
| A0A0U1      | Protein MMP24OS                                                    | MMP24OS         | 0.04            | 1.02 ↑      |
| O00487      | 26S proteasome non-ATPase regulatory subunit 14                    | PSMD14          | 0.03            | 1.02 ↑      |
| Q9Y5L4      | Mitochondrial import inner membrane translocase subunit Tim13      | TIMM13          | 0.03            | 1.03 ↑      |
| Q8WUM4      | Programmed cell death 6-interacting protein                        | PDCD6IP         | 0.03            | 1.02 ↑      |
| P26373      | 60S ribosomal protein L13                                          | RPL13           | 0.03            | 1.04 ↑      |
| P09651      | Heterogeneous nuclear ribonucleoprotein A1                         | HNRNPA1         | 0.03            | 1.01 ↑      |
| P42677      | 40S ribosomal protein S27                                          | RPS27           | 0.03            | 1.03 ↑      |
| P40222      | Alpha-taxilin                                                      | TXLNA           | 0.03            | 1.02 ↑      |
| P41567      | Eukaryotic translation initiation factor 1 (eIF1)                  | EIF1            | 0.03            | 1.09 ↑      |
| P62277      | 40S ribosomal protein S13                                          | RPS13           | 0.03            | 1.02 ↑      |
| P08195      | 4F2 cell-surface antigen heavy chain (4F2hc)                       | SLC3A2          | 0.03            | 1.02 ↑      |
| Q9HAV4      | Exportin-5                                                         | XPO5            | 0.03            | 1.02 ↑      |
| Q5JTH9      | RRP12-like protein                                                 | RRP12           | 0.03            | 1.03 ↑      |
| Q14011      | Cold-inducible RNA-binding protein                                 | CIRBP           | 0.03            | 1.02 ↑      |
| Q9NYF8      | Bcl-2-associated transcription factor 1 (Btf)                      | BCLAF1          | 0.03            | 1.02 ↑      |
| Q9BWM7      | Sideroflexin-3                                                     | SFXN3           | 0.02            | 1.01 ↑      |
| P50502      | Hsc70-interacting protein (Hip)                                    | ST13<br>FAM10A1 | 0.02            | 1.01 ↑      |
| P22102      | Trifunctional purine biosynthetic protein adenosine-3              | GART            | 0.02            | 1.01 ↑      |
| P18124      | 60S ribosomal protein L7                                           | RPL7            | 0.02            | 1.03 ↑      |
| Q02978      | Mitochondrial 2-oxoglutarate/malate carrier protein                | SLC25A11        | 0.02            | 1.01 ↑      |
| P08865      | 40S ribosomal protein SA                                           | RPSA            | 0.02            | 1.01 ↑      |
| Q00325      | Phosphate carrier protein                                          | SLC25A6         | 0.02            | 1.02 ↑      |
| P16989      | Y-box-binding protein 3                                            | YBX3            | 0.02            | 1.03 ↑      |
| P16949      | Stathmin                                                           | STMN1           | 0.02            | 1.05 ↑      |
| P0DMV9      | Heat shock 70 kDa protein 1B                                       | HSPA1B          | 0.02            | 1.01 ↑      |
| Q9POL0      | Vesicle-associated membrane protein-associated protein A (VAMP-A)  | VAPA<br>VAP33   | 0.02            | 1.01 ↑      |

| Protein IDs | Protein Names                                                              | Gene IDs         | <i>p</i> -value | Fold Change |
|-------------|----------------------------------------------------------------------------|------------------|-----------------|-------------|
| P21333      | Filamin-A (FLN-A)                                                          | FLNA/ FLN        | 0.02            | 1.01 ↑      |
| P27635      | 60S ribosomal protein L10                                                  | RPL10            | 0.02            | 1.05 ↑      |
| O60664      | Perilipin-3                                                                | PLIN3            | 0.02            | 1.02 ↑      |
| O14974      | Protein phosphatase 1 regulatory subunit 12A                               | PPP1R12A         | 0.01            | 1.03 ↑      |
| Q9NR30      | Nucleolar RNA helicase 2 (DEAD box protein 21)                             | DDX21            | 0.01            | 1.02 ↑      |
| P51858      | Hepatoma-derived growth factor                                             | HDGF             | 0.01            | 1.01 ↑      |
| Q8TEX9      | Importin-4                                                                 | IPO4             | 0.01            | 1.02 ↑      |
| P60842      | Eukaryotic initiation factor 4A-I (eIF-4A-I)                               | EIF4A1           | 0.01            | 1.01 ↑      |
| P16403      | Histone H1.2                                                               | H1-2<br>HIST1H1C | 0.01            | 1.02 ↑      |
| P17844      | Probable ATP-dependent RNA helicase DDX5 (DEAD box protein 5)              | DDX5             | 0.01            | 1.02 ↑      |
| P62241      | 40S ribosomal protein S8                                                   | RPS8             | 0.01            | 1.01 ↑      |
| P62829      | 60S ribosomal protein L23                                                  | RPL23            | 0.01            | 1.03 ↑      |
| P11940      | Polyadenylate-binding protein 1                                            | PABPC1           | 0.01            | 1.02 ↑      |
| P68366      | Tubulin alpha-4A chain                                                     | TUBA4A           | 0.01            | 1.03 ↑      |
| Q16186      | Proteasomal ubiquitin receptor ADRM1                                       | ADRM1            | 0.01            | 1.03 ↑      |
| Q07960      | Rho GTPase-activating protein 1                                            | ARHGAP1          | 0.01            | 1.02 ↑      |
| Q01081      | Splicing factor U2AF 35 kDa subunit                                        | U2AF1            | 0.01            | 1.04 ↑      |
| P19105      | Myosin regulatory light chain 12A                                          | MYL12A           | 0.009           | 1.01 ↑      |
| P46781      | 40S ribosomal protein S9                                                   | RPS9             | 0.009           | 1.01 ↑      |
| Q9UMX0      | Ubiquilin-1                                                                | UBQLN1           | 0.008           | 1.03 ↑      |
| P24928      | DNA-directed RNA polymerase II subunit RPB1 (RNA polymerase II subunit B1) | POLR2A<br>POLR2  | 0.008           | 1.02 ↑      |
| Q9UQ80      | Proliferation-associated protein 2G4                                       | PA2G4            | 0.008           | 1.01 ↑      |
| Q9Y5B9      | FACT complex subunit SPT16                                                 | SUPT16H          | 0.007           | 1.01 ↑      |
| P62913      | 60S ribosomal protein L11                                                  | RPL11            | 0.007           | 1.02 ↑      |
| Q07955      | Serine/arginine-rich splicing factor 1                                     | SRSF1            | 0.006           | 1.02 ↑      |
| P19338      | Nucleolin                                                                  | NCL              | 0.006           | 1.01 ↑      |
| O75396      | Vesicle-trafficking protein SEC22b                                         | SEC22B           | 0.006           | 1.03 ↑      |
| Q9H1E3      | Nuclear ubiquitous casein and cyclin-dependent kinase substrate 1 (p21)    | NUCKS1           | 0.006           | 1.03 ↑      |
| P67809      | Y-box-binding protein 1 (YB-1)                                             | YBX1             | 0.005           | 1.03 ↑      |
| P11142      | Heat shock cognate 71 kDa protein                                          | HSPA8<br>HSC70   | 0.005           | 1.01 ↑      |
| P12236      | Solute carrier family 25 member 6                                          | SLC25A6          | 0.005           | 1.01 ↑      |
| P31153      | S-adenosylmethionine synthase isoform type-2                               | MAT2A            | 0.004           | 1.02 ↑      |

| <b>Protein IDs</b> | <b>Protein Names</b>                                                       | <b>Gene IDs</b>   | <b><i>p</i>-value</b> | <b>Fold Change</b> |
|--------------------|----------------------------------------------------------------------------|-------------------|-----------------------|--------------------|
| Q08J23             | RNA cytosine C(5)-methyltransferase<br>NSUN2                               | NSUN2             | 0.004                 | 1.06 ↑             |
| P05386             | 60S acidic ribosomal protein P1                                            | RPLP1             | 0.003                 | 1.02 ↑             |
| P26641             | Elongation factor 1-gamma (EF-1-gamma)                                     | EEF1G<br>EF1G     | 0.003                 | 1.02 ↑             |
| Q15050             | Ribosome biogenesis regulatory protein<br>homolog                          | RRS1              | 0.003                 | 1.03 ↑             |
| O15355             | Protein phosphatase 1G                                                     | PPM1G             | 0.003                 | 1.02 ↑             |
| P56537             | Eukaryotic translation initiation factor 6                                 | EIF6              | 0.002                 | 1.01 ↑             |
| Q13151             | Heterogeneous nuclear ribonucleoprotein A0<br>(hnRNP A0)                   | HNRNPA0<br>HNRPA0 | 0.002                 | 1.03 ↑             |
| P05387             | 60S acidic ribosomal protein P2                                            | RPLP2             | 0.002                 | 1.01 ↑             |
| P09493             | Tropomyosin alpha-1 chain                                                  | TPM1              | 0.001                 | 1.04 ↑             |
| Q15942             | Zyxin (Zyxin-2)                                                            | ZYX               | 0.0008                | 1.10 ↑             |
| Q13501             | Sequestosome-1 (EBI3-associated protein of<br>60 kDa) (EBIAP) (p60)        | SQSTM1            | 0.0007                | 1.07 ↑             |
| P12268             | Inosine-5'-monophosphate dehydrogenase 2<br>(IMP dehydrogenase 2) (IMPD 2) | IMPDH2<br>IMPD2   | 0.0005                | 1.02 ↑             |
| Q8TDN6             | Ribosome biogenesis protein BRX1 homolog                                   | BRX1              | 0.0004                | 1.03 ↑             |
| Q92945             | Far upstream element-binding protein 2<br>(FUSE-binding protein 2)         | KHSRP<br>FUBP2    | 0.0003                | 1.02 ↑             |
| P46087             | Probable 28S rRNA (cytosine (4447)-C (5))-<br>methyltransferase            | NOP2              | 0.00003               | 1.05 ↑             |

**Table S8.** List of altered proteins in U87MG cells versusControl, after treatment with 0.5  $\mu$ M ST1926 for 48 hours. A total of 282 proteins with significant changes (125 downregulated (↓) and 157 upregulated (↑)) were identified in U87MG with  $p < 0.05$ .

| Protein IDs | Protein Names                                                                                             | Gene IDs | <i>p</i> -value | Fold Change |
|-------------|-----------------------------------------------------------------------------------------------------------|----------|-----------------|-------------|
| P42704      | Leucine-rich PPR motif-containing protein, mitochondrial (130 kDa leucine-rich protein) (LRP 130)         | LPPRC    | 0.00008         | 0.99 ↓      |
| P46013      | Proliferation marker protein Ki-67 (Antigen Ki67)                                                         | KI67     | 0.0001          | 0.91 ↓      |
| Q13185      | Chromobox protein homolog 3 (HECH)                                                                        | CBX3     | 0.0002          | 0.96 ↓      |
| P07196      | Neurofilament light polypeptide (NF-L)                                                                    | NFL      | 0.0002          | 0.95 ↓      |
| Q9P2E9      | Ribosome-binding protein 1 (180 kDa ribosome receptor homolog) (RRp)                                      | RRBP1    | 0.0003          | 0.93 ↓      |
| Q9BY67      | Cell adhesion molecule 1 (Immunoglobulin superfamily member 4) (IgSF4)                                    | CADM1    | 0.0003          | 0.97 ↓      |
| P11047      | Laminin subunit gamma-1 (Laminin B2 chain)                                                                | LAMC1    | 0.0004          | 0.94 ↓      |
| P26358      | DNA (cytosine-5)-methyltransferase 1 (Dnmt1)                                                              | DNMT1    | 0.0004          | 0.91 ↓      |
| O00469      | Procollagen-lysine,2-oxoglutarate 5-dioxygenase 2 (Lysyl hydroxylase 2) (LH2)                             | PLOD2    | 0.0006          | 0.96 ↓      |
| P14625      | Endoplasmin (94 kDa glucose-regulated protein) (GRP-94)                                                   | ENPL     | 0.0006          | 0.99 ↓      |
| P12956      | X-ray repair cross-complementing protein 6                                                                | XRCC6    | 0.0006          | 0.99 ↓      |
| O14979      | Heterogeneous nuclear ribonucleoprotein D-like (hnRNP D-like)                                             | HNRDL    | 0.0006          | 0.97 ↓      |
| P06576      | ATP synthase subunit beta, mitochondrial                                                                  | ATPB     | 0.0007          | 0.99 ↓      |
| P13667      | Protein disulfide-isomerase A4                                                                            | PDIA4    | 0.0007          | 0.98 ↓      |
| P46940      | Ras GTPase-activating-like protein IQGAP1 (p195)                                                          | IQGA1    | 0.0007          | 0.99 ↓      |
| Q92896      | Golgi apparatus protein 1 (CFR-1)                                                                         | GSLG1    | 0.001           | 0.95 ↓      |
| Q02809      | Procollagen-lysine,2-oxoglutarate 5-dioxygenase 1 (Lysyl hydroxylase 1) (LH1)                             | PLOD1    | 0.001           | 0.95 ↓      |
| Q09666      | Neuroblast differentiation-associated protein AHNK (Desmoyokin)                                           | AHNK     | 0.001           | 0.99 ↓      |
| P35613      | Basigin (5F7) (Collagenase stimulatory factor) (Extracellular matrix metalloproteinase inducer) (EMMPRIN) | BASI     | 0.001           | 0.98 ↓      |
| P11388      | DNA topoisomerase 2-alpha                                                                                 | TOP2A    | 0.002           | 0.91 ↓      |
| O95573      | Fatty acid CoA ligase Acs13 (Arachidonate--CoA ligase)                                                    | ACSL3    | 0.002           | 0.97 ↓      |
| Q58FF8      | Putative heat shock protein HSP 90-beta 2                                                                 | H90B2    | 0.002           | 0.96 ↓      |
| P26006      | Integrin alpha-3 (CD49 antigen-like family member C) (FRP-2)                                              | ITA3     | 0.002           | 0.98 ↓      |

| Protein IDs | Protein Names                                                                                                                  | Gene IDs | p-value | Fold Change |
|-------------|--------------------------------------------------------------------------------------------------------------------------------|----------|---------|-------------|
| P04181      | Ornithine aminotransferase, mitochondrial                                                                                      | OAT      | 0.002   | 0.95 ↓      |
| P52292      | Importin subunit alpha-1 (Karyopherin subunit alpha-2) (RAG cohort protein 1) (SRP1-alpha)                                     | IMA1     | 0.002   | 0.96 ↓      |
| P04899      | Guanine nucleotide-binding protein G(i) subunit alpha-2                                                                        | GNAI2    | 0.003   | 0.98 ↓      |
| Q08380      | Galectin-3-binding protein (Basement membrane autoantigen p105)                                                                | LG3BP    | 0.003   | 0.95 ↓      |
| Q9Y224      | RNA transcription, translation and transport factor protein (CLE7 homolog) (CLE) (hCLE)                                        | RTRAF    | 0.004   | 0.99 ↓      |
| P12004      | Proliferating cell nuclear antigen (PCNA) (Cyclin)                                                                             | PCNA     | 0.004   | 0.98 ↓      |
| Q13263      | Transcription intermediary factor 1-beta (TIF1-beta)                                                                           | TIF1B    | 0.004   | 0.99 ↓      |
| P30084      | Enoyl-CoA hydratase, mitochondrial (mECH) (mECH1)                                                                              | ECHM     | 0.004   | 0.98 ↓      |
| O60313      | Dynamin-like 120 kDa protein, mitochondrial (Optic atrophy protein 1)                                                          | OPA1     | 0.004   | 0.97 ↓      |
| O60264      | SWI/SNF-related matrix-associated actin-dependent regulator of chromatin subfamily A member 5                                  | SMCA5    | 0.004   | 0.98 ↓      |
| O75643      | U5 small nuclear ribonucleoprotein 200 kDa helicase (Activating signal cointegrator 1 complex subunit 3-like 1) (BRR2 homolog) | U520     | 0.005   | 0.98 ↓      |
| Q6DD88      | Atlastin-3                                                                                                                     | ATLA3    | 0.005   | 0.98 ↓      |
| O15427      | Monocarboxylate transporter 4 (MCT 4)                                                                                          | MOT4     | 0.005   | 0.98 ↓      |
| Q9Y2W1      | Thyroid hormone receptor-associated protein 3 (BCLAF1 and THRAP3 family member 2)                                              | TR150    | 0.006   | 0.98 ↓      |
| P02786      | Transferrin receptor protein 1 (TR) (TfR) (TfR1) (Trfr) (T9) (p90) (CD antigen CD71)                                           | TFR1     | 0.006   | 0.98 ↓      |
| P04216      | Thy-1 membrane glycoprotein (CDw90) (Thy-1 antigen) (CD antigen CD90)                                                          | THY1     | 0.006   | 0.97 ↓      |
| Q16790      | Carbonic anhydrase 9                                                                                                           | CAH9     | 0.006   | 0.97 ↓      |
| P12277      | Creatine kinase B-type (Brain creatine kinase) (B-CK)                                                                          | KCRB     | 0.006   | 0.98 ↓      |
| P16144      | Integrin beta-4 (GP150) (CD antigen CD104)                                                                                     | ITB4     | 0.007   | 0.96 ↓      |
| O75533      | Splicing factor 3B subunit 1 (Pre-mRNA-splicing factor SF3b 155 kDa subunit)                                                   | SF3B1    | 0.007   | 0.99 ↓      |
| P09382      | Galectin-1 (Gal-1) (14 kDa laminin-binding protein) (HLBP14)                                                                   | LEG1     | 0.008   | 0.99 ↓      |
| Q8NBS9      | Thioredoxin domain-containing protein 5                                                                                        | TXND5    | 0.008   | 0.98 ↓      |
| Q96RP9      | Elongation factor G, mitochondrial (EF-Gmt)                                                                                    | EFGM     | 0.009   | 0.97 ↓      |
| Q9BZZ5      | Apoptosis inhibitor 5 (API-5) (Antiapoptosis clone 11 protein)                                                                 | API5     | 0.01    | 0.99 ↓      |

| Protein IDs | Protein Names                                                                                                                                    | Gene IDs | <i>p</i> -value | Fold Change |
|-------------|--------------------------------------------------------------------------------------------------------------------------------------------------|----------|-----------------|-------------|
| Q15907      | Ras-related protein Rab-11B (GTP-binding protein YPT3)                                                                                           | RB11B    | 0.01            | 0.99 ↓      |
| P50454      | Serpin H1 (47 kDa heat shock protein) (Arsenic-transactivated protein 3) (AsTP3)                                                                 | SERPH    | 0.01            | 0.99 ↓      |
| O75475      | PC4 and SFRS1-interacting protein (CLL-associated antigen KW-7) (Dense fine speckles 70 kDa protein) (DFS 70)                                    | PSIP1    | 0.01            | 0.93 ↓      |
| Q14980      | Nuclear mitotic apparatus protein 1 (Nuclear matrix protein-22) (NMP-22)                                                                         | NUMA1    | 0.01            | 0.97 ↓      |
| P49327      | Fatty acid synthase                                                                                                                              | FAS      | 0.01            | 0.99 ↓      |
| P13674      | Prolyl 4-hydroxylase subunit alpha-1 (4-PH alpha-1)                                                                                              | P4HA1    | 0.01            | 0.97 ↓      |
| Q15717      | ELAV-like protein 1 (Hu-antigen R) (HuR)                                                                                                         | ELAV1    | 0.01            | 0.98 ↓      |
| P49321      | Nuclear autoantigenic sperm protein (NASP)                                                                                                       | NASP     | 0.01            | 0.98 ↓      |
| P43304      | Glycerol-3-phosphate dehydrogenase, mitochondrial (GPD-M) (GPDH-M)                                                                               | GPDM     | 0.01            | 0.97 ↓      |
| O75534      | Cold shock domain-containing protein E1 (N-ras upstream gene protein) (Protein UNR)                                                              | CSDE1    | 0.01            | 0.99 ↓      |
| P51659      | Peroxisomal multifunctional enzyme type 2 (MFE-2)                                                                                                | DHB4     | 0.01            | 0.98 ↓      |
| Q32P28      | Prolyl 3-hydroxylase 1                                                                                                                           | P3H1     | 0.01            | 0.98 ↓      |
| P11717      | Cation-independent mannose-6-phosphate receptor (CI Man-6-P receptor)                                                                            | MPRI     | 0.01            | 0.98 ↓      |
| Q14008      | Cytoskeleton-associated protein 5 (Colonic and hepatic tumor overexpressed gene protein) (Ch-TOG)                                                | CKAP5    | 0.01            | 0.98 ↓      |
| Q9H3N1      | Thioredoxin-related transmembrane protein 1 (Thioredoxin domain-containing protein 1) (Transmembrane Trx-related protein)                        | TMX1     | 0.01            | 0.98 ↓      |
| P06748      | Nucleophosmin (NPM)                                                                                                                              | NPM      | 0.01            | 0.98 ↓      |
| P35221      | Catenin alpha-1 (Alpha E-catenin)                                                                                                                | CTNA1    | 0.01            | 0.98 ↓      |
| Q14103      | Heterogeneous nuclear ribonucleoprotein D0 (hnRNP D0)                                                                                            | HNRPD    | 0.01            | 0.99 ↓      |
| P16278      | Beta-galactosidase (Acid beta-galactosidase)                                                                                                     | BGAL     | 0.02            | 0.98 ↓      |
| Q96HE7      | ERO1-like protein alpha (ERO1-L) (ERO1-L-alpha)                                                                                                  | ERO1A    | 0.02            | 0.98 ↓      |
| Q9H4G4      | Golgi-associated plant pathogenesis-related protein 1 (GAPR-1) (Golgi-associated PR-1 protein) (Glioma pathogenesis-related protein 2) (GliPR 2) | GAPR1    | 0.02            | 0.97 ↓      |

| Protein IDs | Protein Names                                                                                                                        | Gene IDs | <i>p</i> -value | Fold Change |
|-------------|--------------------------------------------------------------------------------------------------------------------------------------|----------|-----------------|-------------|
| Q15029      | 116 kDa U5 small nuclear ribonucleoprotein component (Elongation factor Tu GTP-binding domain-containing protein 2) (SNU114 homolog) | U5S1     | 0.02            | 0.99 ↓      |
| P63208      | S-phase kinase-associated protein 1 (Cyclin-A/CDK2-associated protein p19) (p19A)                                                    | SKP1     | 0.02            | 0.97 ↓      |
| P62873      | Guanine nucleotide-binding protein G(I)/G(S)/G(T) subunit beta-1 (Transducin beta chain 1)                                           | GBB1     | 0.02            | 0.98 ↓      |
| Q15393      | Splicing factor 3B subunit 3                                                                                                         | SF3B3    | 0.02            | 0.99 ↓      |
| P13804      | Electron transfer flavoprotein subunit alpha, mitochondrial (Alpha-ETF)                                                              | ETFA     | 0.02            | 0.97 ↓      |
| P45877      | Peptidyl-prolyl cis-trans isomerase C (PPIase C)                                                                                     | PPIC     | 0.02            | 0.98 ↓      |
| Q16531      | DNA damage-binding protein 1 (DDB p127 subunit)                                                                                      | DDB1     | 0.02            | 0.98 ↓      |
| P30101      | Protein disulfide-isomerase A3                                                                                                       | PDIA3    | 0.02            | 0.98 ↓      |
| P38159      | RNA-binding motif protein, X chromosome (Glycoprotein p43)                                                                           | RBMX     | 0.02            | 0.99 ↓      |
| P61978      | Heterogeneous nuclear ribonucleoprotein K (hnRNP K) (Transformation up-regulated nuclear protein) (TUNP)                             | HNRPK    | 0.02            | 0.98 ↓      |
| P08670      | Vimentin                                                                                                                             | VIME     | 0.02            | 0.99 ↓      |
| O14980      | Exportin-1 (Exp1) (Chromosome region maintenance 1 protein homolog)                                                                  | XPO1     | 0.02            | 0.99 ↓      |
| Q1KMD3      | Heterogeneous nuclear ribonucleoprotein U-like protein 2 (Scaffold-attachment factor A2) (SAF-A2)                                    | HNRL2    | 0.02            | 0.99 ↓      |
| P30876      | DNA-directed RNA polymerase II subunit RPB2                                                                                          | RPB2     | 0.02            | 0.95 ↓      |
| P16615      | Sarcoplasmic/endoplasmic reticulum calcium ATPase 2 (SERCA2) (SR Ca(2+)-ATPase 2)                                                    | AT2A2    | 0.02            | 0.97 ↓      |
| P51398      | Small ribosomal subunit protein mS29 (28S ribosomal protein S29, mitochondrial) (MRP-S29)                                            | RT29     | 0.02            | 0.96 ↓      |
| Q86UP2      | Kinectin (CG-1 antigen) (Kinesin receptor)                                                                                           | KTN1     | 0.02            | 0.98 ↓      |
| P07858      | Cathepsin B (APP secretase) (APPS)                                                                                                   | CATB     | 0.02            | 0.97 ↓      |
| P61289      | Proteasome activator complex subunit 3 (11S regulator complex subunit gamma) (REG-gamma)                                             | PSME3    | 0.02            | 0.98 ↓      |
| Q12769      | Nuclear pore complex protein Nup160 (160 kDa nucleoporin) (Nucleoporin Nup160)                                                       | NU160    | 0.02            | 0.96 ↓      |
| P43307      | Translocon-associated protein subunit alpha (TRAP-alpha) (Signal sequence receptor subunit alpha) (SSR-alpha)                        | SSRA     | 0.02            | 0.98 ↓      |
| Q9H0U4      | Ras-related protein Rab-1B                                                                                                           | RAB1B    | 0.02            | 0.98 ↓      |



| Protein IDs | Protein Names                                                                                                                              | Gene IDs | <i>p</i> -value | Fold Change |
|-------------|--------------------------------------------------------------------------------------------------------------------------------------------|----------|-----------------|-------------|
| P09661      | U2 small nuclear ribonucleoprotein A' (U2 snRNP A')                                                                                        | RU2A     | 0.03            | 0.98 ↓      |
| P63010      | AP-2 complex subunit beta (AP105B)                                                                                                         | AP2B1    | 0.03            | 0.99 ↓      |
| P07910      | Heterogeneous nuclear ribonucleoproteins C1/C2 (hnRNP C1/C2)                                                                               | HNRPC    | 0.03            | 0.98 ↓      |
| P62191      | 26S proteasome regulatory subunit 4 (P26s4)                                                                                                | PRS4     | 0.03            | 0.98 ↓      |
| P62805      | Histone H4                                                                                                                                 | H4       | 0.03            | 0.99 ↓      |
| P61586      | Transforming protein RhoA (Rho cDNA clone 12) (h12)                                                                                        | RHOA     | 0.03            | 0.98 ↓      |
| P07900      | Heat shock protein HSP 90-alpha (Heat shock 86 kDa) (HSP 86) (HSP86)                                                                       | HS90A    | 0.03            | 0.99 ↓      |
| P16401      | Histone H1.5 (Histone H1a) (Histone H1b) (Histone H1s-3)                                                                                   | H15      | 0.03            | 0.98 ↓      |
| Q92499      | ATP-dependent RNA helicase DDX1 (DEAD box protein 1) (DEAD box protein retinoblastoma) (DBP-RB)                                            | DDX1     | 0.03            | 0.99 ↓      |
| P05023      | Sodium/potassium-transporting ATPase subunit alpha-1 (Na(+)/K(+) ATPase alpha-1 subunit)                                                   | AT1A1    | 0.03            | 0.99 ↓      |
| P12109      | Collagen alpha-1(VI) chain                                                                                                                 | CO6A1    | 0.03            | 0.96 ↓      |
| P78527      | DNA-dependent protein kinase catalytic subunit (DNA-PK catalytic subunit) (DNA-PKcs) (DNPK1) (p460)                                        | PRKDC    | 0.03            | 0.99 ↓      |
| P51114      | RNA-binding protein FXR1 (FMR1 autosomal homolog 1) (hFXR1p)                                                                               | FXR1     | 0.03            | 0.98 ↓      |
| P08238      | Heat shock protein HSP 90-beta (HSP 90) (Heat shock 84 kDa) (HSP 84) (HSP84)                                                               | HS90B    | 0.03            | 0.99 ↓      |
| Q14978      | Nucleolar and coiled-body phosphoprotein 1 (140 kDa nucleolar phosphoprotein) (Nopp140) (Hepatitis C virus NS5A-transactivated protein 13) | NOLC1    | 0.03            | 0.97 ↓      |
| P62760      | Visinin-like protein 1 (VILIP) (VLP-1) (Hippocalcin-like protein 3) (HLP3)                                                                 | VISL1    | 0.04            | 0.98 ↓      |
| P48681      | Nestin                                                                                                                                     | NEST     | 0.04            | 0.99 ↓      |
| P54886      | Delta-1-pyrroline-5-carboxylate synthase (P5CS)                                                                                            | P5CS     | 0.04            | 0.98 ↓      |
| P55084      | Trifunctional enzyme subunit beta, mitochondrial (TP-beta)                                                                                 | ECHB     | 0.04            | 0.99 ↓      |
| P0DP25      | Calmodulin-3                                                                                                                               | CALM3    | 0.04            | 0.99 ↓      |
| P17844      | Probable ATP-dependent RNA helicase DDX5 (DEAD box protein 5) (RNA helicase p68)                                                           | DDX5     | 0.04            | 0.99 ↓      |
| Q68CZ2      | Tensin-3 (Tensin-like SH2 domain-containing protein 1) (Tumor endothelial marker 6)                                                        | TENS3    | 0.04            | 0.96 ↓      |
| Q9NZM1      | Myoferlin (Fer-1-like protein 3)                                                                                                           | MYOF     | 0.04            | 0.98 ↓      |

| Protein IDs | Protein Names                                                                                                                                                             | Gene IDs | <i>p</i> -value | Fold Change |
|-------------|---------------------------------------------------------------------------------------------------------------------------------------------------------------------------|----------|-----------------|-------------|
| Q9UBB4      | Ataxin-10 (Brain protein E46 homolog) (Spinocerebellar ataxia type 10 protein)                                                                                            | ATX10    | 0.04            | 0.97 ↓      |
| Q12797      | Aspartyl/asparaginyl beta-hydroxylase (Aspartate beta-hydroxylase)                                                                                                        | ASPH     | 0.04            | 0.99 ↓      |
| Q15233      | Non-POU domain-containing octamer-binding protein (NonO protein)                                                                                                          | NONO     | 0.04            | 0.98 ↓      |
| P39656      | Dolichyl-diphosphooligosaccharide--protein glycosyltransferase 48 kDa subunit (DDOST 48 kDa subunit) (Oligosaccharyl transferase 48 kDa subunit)                          | OST48    | 0.04            | 0.99 ↓      |
| Q15084      | Protein disulfide-isomerase A6 (Endoplasmic reticulum protein 5) (ER protein 5) (ERp5) (Protein disulfide isomerase P5) (Thioredoxin domain-containing protein 7)         | PDIA6    | 0.04            | 0.99 ↓      |
| Q9Y2J8      | Protein-arginine deiminase type-2 (PAD-H19) (Peptidylarginine deiminase II) (Protein-arginine deiminase type II)                                                          | PADI2    | 0.04            | 0.99 ↓      |
| Q15293      | Reticulocalbin-1                                                                                                                                                          | RCN1     | 0.04            | 0.99 ↓      |
| Q07065      | Cytoskeleton-associated protein 4 (63-kDa cytoskeleton-linking membrane protein) (Climp-63) (p63)                                                                         | CKAP4    | 0.04            | 0.99 ↓      |
| Q9BSJ8      | Extended synaptotagmin-1 (E-Syt1) (Membrane-bound C2 domain-containing protein)                                                                                           | ESYT1    | 0.04            | 0.99 ↓      |
| P49792      | E3 SUMO-protein ligase RanBP2 (358 kDa nucleoporin) (Nuclear pore complex protein Nup358) (Nucleoporin Nup358) (Ran-binding protein 2) (RanBP2) (p270)                    | RBP2     | 0.04            | 0.90 ↓      |
| P08559      | Pyruvate dehydrogenase E1 component subunit alpha, somatic form, mitochondrial (PDHE1-A type I)                                                                           | ODPA     | 0.04            | 0.98 ↓      |
| O00231      | 26S proteasome non-ATPase regulatory subunit 11 (26S proteasome regulatory subunit RPN6) (26S proteasome regulatory subunit S9) (26S proteasome regulatory subunit p44.5) | PSD11    | 0.04            | 0.99 ↓      |
| O15260      | Surfeit locus protein 4                                                                                                                                                   | SURF4    | 0.04            | 0.99 ↓      |
| P08708      | Small ribosomal subunit protein eS17 (40S ribosomal protein S17)                                                                                                          | RS17     | 0.04            | 1.03 ↑      |
| P68036      | Ubiquitin-conjugating enzyme E2 L3 (E2 ubiquitin-conjugating enzyme L3)                                                                                                   | UB2L3    | 0.04            | 1.03 ↑      |
| P23588      | Eukaryotic translation initiation factor 4B (eIF-4B)                                                                                                                      | IF4B     | 0.04            | 1.03 ↑      |
| Q99615      | DnaJ homolog subfamily C member 7 (Tetratricopeptide repeat protein 2)                                                                                                    | DNJC7    | 0.04            | 1.02 ↑      |

| Protein IDs | Protein Names                                                                                                                         | Gene IDs | <i>p</i> -value | Fold Change |
|-------------|---------------------------------------------------------------------------------------------------------------------------------------|----------|-----------------|-------------|
| Q13435      | Splicing factor 3B subunit 2 (Pre-mRNA-splicing factor SF3b 145 kDa subunit) (SF3b145)                                                | SF3B2    | 0.04            | 1.01 ↑      |
| Q02790      | Peptidyl-prolyl cis-trans isomerase FKBP4 (PPIase FKBP4) (51 kDa FK506-binding protein) (FKBP51)                                      | FKBP4    | 0.04            | 1.01 ↑      |
| P53004      | Biliverdin reductase A (BVR A) (Biliverdin-IX alpha-reductase)                                                                        | BIEA     | 0.04            | 1.02 ↑      |
| Q9Y265      | RuvB-like 1 (49 kDa TATA box-binding protein-interacting protein)                                                                     | RUVB1    | 0.04            | 1.01 ↑      |
| P83731      | Large ribosomal subunit protein eL24 (60S ribosomal protein L24)                                                                      | RL24     | 0.04            | 1.10 ↑      |
| P14314      | Glucosidase 2 subunit beta (80K-H protein)                                                                                            | GLU2B    | 0.04            | 1.01 ↑      |
| Q96C19      | EF-hand domain-containing protein D2 (Swiprosin-1)                                                                                    | EFHD2    | 0.04            | 1.02 ↑      |
| P47895      | Retinaldehyde dehydrogenase 3 (RALDH-3)                                                                                               | AL1A3    | 0.04            | 1.04 ↑      |
| P17174      | Aspartate aminotransferase, cytoplasmic (cAspAT)                                                                                      | AATC     | 0.04            | 1.02 ↑      |
| Q02543      | Large ribosomal subunit protein eL20 (60S ribosomal protein L18a)                                                                     | RL18A    | 0.04            | 1.01 ↑      |
| P13797      | Plastin-3 (T-plastin)                                                                                                                 | PLST     | 0.04            | 1.01 ↑      |
| P62249      | Small ribosomal subunit protein uS9 (40S ribosomal protein S16)                                                                       | RS16     | 0.04            | 1.02 ↑      |
| Q13155      | Aminoacyl tRNA synthase complex-interacting multifunctional protein 2 (Multisynthase complex auxiliary component p38) (Protein JTV-1) | AIMP2    | 0.04            | 1.02 ↑      |
| O60664      | Perilipin-3 (47 kDa mannose 6-phosphate receptor-binding protein)                                                                     | PLIN3    | 0.04            | 1.03 ↑      |
| Q99798      | Aconitate hydratase, mitochondrial (Aconitase) (Citrate hydro-lyase)                                                                  | ACON     | 0.04            | 1.01 ↑      |
| P04792      | Heat shock protein beta-1 (HspB1) (28 kDa heat shock protein)                                                                         | HSPB1    | 0.04            | 1.01 ↑      |
| P61353      | Large ribosomal subunit protein eL27 (60S ribosomal protein L27)                                                                      | RL27     | 0.04            | 1.02 ↑      |
| Q06830      | Peroxiredoxin-1 (Natural killer cell-enhancing factor A) (NKEF-A)                                                                     | PRDX1    | 0.04            | 1.01 ↑      |
| P55884      | Eukaryotic translation initiation factor 3 subunit B (eIF3b)                                                                          | EIF3B    | 0.04            | 1.01 ↑      |
| P46060      | Ran GTPase-activating protein 1 (RanGAP1)                                                                                             | RAGP1    | 0.04            | 1.01 ↑      |
| Q07960      | Rho GTPase-activating protein 1 (CDC42 GTPase-activating protein)                                                                     | RHG01    | 0.04            | 1.02 ↑      |
| Q14192      | Four and a half LIM domains protein 2 (FHL-2) (LIM domain protein DRAL) (Skeletal muscle LIM-protein 3) (SLIM-3)                      | FHL2     | 0.03            | 1.08 ↑      |

| Protein IDs | Protein Names                                                                                                                          | Gene IDs | <i>p</i> -value | Fold Change |
|-------------|----------------------------------------------------------------------------------------------------------------------------------------|----------|-----------------|-------------|
| P04075      | Fructose-bisphosphate aldolase A (Lung cancer antigen NY-LU-1) (Muscle-type aldolase)                                                  | ALDOA    | 0.03            | 1.01 ↑      |
| Q9BRJ6      | Uncharacterized protein C7orf50                                                                                                        | CG050    | 0.03            | 1.01 ↑      |
| Q9NRX4      | 14 kDa phosphohistidine phosphatase (Phosphohistidine phosphatase 1) (PHPT1)                                                           | PHP14    | 0.03            | 1.03 ↑      |
| P08134      | Rho-related GTP-binding protein RhoC (Rho cDNA clone 9) (h9)                                                                           | RHOC     | 0.03            | 1.01 ↑      |
| P26599      | Polypyrimidine tract-binding protein 1 (PTB) (57 kDa RNA-binding protein PPTB-1) (Heterogeneous nuclear ribonucleoprotein I) (hnRNP I) | PTBP1    | 0.03            | 1.01 ↑      |
| P63104      | 14-3-3 protein zeta/delta (Protein kinase C inhibitor protein 1) (KCIP-1)                                                              | 1433Z    | 0.03            | 1.01 ↑      |
| P11586      | C-1-tetrahydrofolate synthase, cytoplasmic (C1-THF synthase) (Epididymis secretory sperm binding protein)                              | C1TC     | 0.03            | 1.01 ↑      |
| P55735      | Protein SEC13 homolog (GATOR complex protein SEC13) (SEC13-like protein 1) (SEC13-related protein)                                     | SEC13    | 0.03            | 1.01 ↑      |
| Q8TAT6      | Nuclear protein localization protein 4 homolog (Protein NPL4)                                                                          | NPL4     | 0.03            | 1.02 ↑      |
| Q9Y230      | RuvB-like 2 (48 kDa TATA box-binding protein-interacting protein)                                                                      | RUVB2    | 0.03            | 1.01 ↑      |
| P11216      | Glycogen phosphorylase, brain form                                                                                                     | PYGB     | 0.03            | 1.02 ↑      |
| Q99613      | Eukaryotic translation initiation factor 3 subunit C (eIF3c)                                                                           | EIF3C    | 0.03            | 1.01 ↑      |
| Q13151      | Heterogeneous nuclear ribonucleoprotein A0 (hnRNP A0)                                                                                  | ROA0     | 0.03            | 1.02 ↑      |
| P17980      | 26S proteasome regulatory subunit 6A (26S proteasome AAA-ATPase subunit RPT5)                                                          | PRS6A    | 0.03            | 1.02 ↑      |
| Q9UQ80      | Proliferation-associated protein 2G4 (Cell cycle protein p38-2G4 homolog) (hG4-1) (ErbB3-binding protein 1)                            | PA2G4    | 0.03            | 1.01 ↑      |
| P62979      | Ubiquitin-ribosomal protein eS31 fusion protein (Ubiquitin carboxyl extension protein 80)                                              | RS27A    | 0.03            | 1.02 ↑      |
| Q9UMX0      | Ubiquilin-1 (Protein linking IAP with cytoskeleton 1) (PLIC-1) (hPLIC-1)                                                               | UBQL1    | 0.03            | 1.03 ↑      |
| Q9UQ35      | Serine/arginine repetitive matrix protein 2 (300 kDa nuclear matrix antigen)                                                           | SRRM2    | 0.03            | 1.07 ↑      |
| Q9Y266      | Nuclear migration protein nudC (Nuclear distribution protein C homolog)                                                                | NUDC     | 0.02            | 1.03 ↑      |

| Protein IDs | Protein Names                                                                                                            | Gene IDs | <i>p</i> -value | Fold Change |
|-------------|--------------------------------------------------------------------------------------------------------------------------|----------|-----------------|-------------|
| Q9Y5B9      | FACT complex subunit SPT16 (Chromatin-specific transcription elongation factor 140 kDa subunit)                          | SP16H    | 0.02            | 1.01 ↑      |
| Q8TEX9      | Importin-4 (Imp4) (Importin-4b) (Imp4b) (Ran-binding protein 4) (RanBP4)                                                 | IPO4     | 0.02            | 1.06 ↑      |
| Q9UNZ2      | NSFL1 cofactor p47 (UBX domain-containing protein 2C) (p97 cofactor p47)                                                 | NSF1C    | 0.02            | 1.10 ↑      |
| Q99426      | Tubulin-folding cofactor B (Cytoskeleton-associated protein 1)                                                           | TBCB     | 0.02            | 1.02 ↑      |
| P62753      | Small ribosomal subunit protein eS6 (40S ribosomal protein S6) (Phosphoprotein NP33)                                     | RS6      | 0.02            | 1.15 ↑      |
| P09211      | Glutathione S-transferase P (GST class-pi) (GSTP1-1)                                                                     | GSTP1    | 0.02            | 1.01 ↑      |
| Q71U36      | Tubulin alpha-1A chain (Alpha-tubulin 3) (Tubulin B-alpha-1) (Tubulin alpha-3 chain)                                     | TBA1A    | 0.02            | 1.01 ↑      |
| Q96T88      | E3 ubiquitin-protein ligase UHRF1 (Inverted CCAAT box-binding protein of 90 kDa) (Nuclear protein 95)                    | UHRF1    | 0.02            | 1.03 ↑      |
| P62917      | Large ribosomal subunit protein uL2 (60S ribosomal protein L8)                                                           | RL8      | 0.02            | 1.04 ↑      |
| P15880      | Small ribosomal subunit protein uS5                                                                                      | RS2      | 0.02            | 1.02 ↑      |
| P35579      | Myosin-9 (Cellular myosin heavy chain, type A)                                                                           | MYH9     | 0.02            | 1.01 ↑      |
| P15559      | NAD(P)H dehydrogenase [quinone] 1                                                                                        | NQO1     | 0.02            | 1.01 ↑      |
| P62888      | Large ribosomal subunit protein eL30 (60S ribosomal protein L30)                                                         | RL30     | 0.02            | 1.01 ↑      |
| Q14247      | Src substrate cortactin (Amplaxin) (Oncogene EMS1)                                                                       | SRC8     | 0.02            | 1.03 ↑      |
| Q9BRA2      | Thioredoxin domain-containing protein 17 (14 kDa thioredoxin-related protein) (TRP14)                                    | TXD17    | 0.02            | 1.03 ↑      |
| P22234      | Bifunctional phosphoribosylaminoimidazole carboxylase/phosphoribosylaminoimidazole succinocarboxamide synthetase (PAICS) | PUR6     | 0.02            | 1.01 ↑      |
| P0DMV9      | Heat shock 70 kDa protein 1B (Heat shock 70 kDa protein 2) (HSP70-2) (HSP70.2)                                           | HS71B    | 0.02            | 1.01 ↑      |
| Q9UKV3      | Apoptotic chromatin condensation inducer in the nucleus (Acinus)                                                         | ACINU    | 0.02            | 1.05 ↑      |
| Q8WWM7      | Ataxin-2-like protein (Ataxin-2 domain protein) (Ataxin-2-related protein)                                               | ATX2L    | 0.02            | 1.06 ↑      |
| Q99829      | Copine-1 (Chromobindin 17) (Copine I)                                                                                    | CPNE1    | 0.02            | 1.02 ↑      |
| P50395      | Rab GDP dissociation inhibitor beta (Rab GDI beta) (Guanosine diphosphate dissociation inhibitor 2) (GDI-2)              | GDIB     | 0.02            | 1.01 ↑      |

| Protein IDs | Protein Names                                                                                                                                                   | Gene IDs | <i>p</i> -value | Fold Change |
|-------------|-----------------------------------------------------------------------------------------------------------------------------------------------------------------|----------|-----------------|-------------|
| P23528      | Cofilin-1 (18 kDa phosphoprotein) (p18) (Cofilin, non-muscle isoform)                                                                                           | COF1     | 0.02            | 1.01 ↑      |
| O75396      | Vesicle-trafficking protein SEC22b (ER-Golgi SNARE of 24 kDa)                                                                                                   | SC22B    | 0.02            | 1.04 ↑      |
| Q08J23      | RNA cytosine C(5)-methyltransferase NSUN2                                                                                                                       | NSUN2    | 0.02            | 1.05 ↑      |
| Q96FW1      | Ubiquitin thioesterase OTUB1                                                                                                                                    | OTUB1    | 0.02            | 1.03 ↑      |
| P23526      | Adenosylhomocysteinase (AdoHcyase)                                                                                                                              | SAHH     | 0.02            | 1.02 ↑      |
| Q9BWM7      | Sideroflexin-3                                                                                                                                                  | SFXN3    | 0.02            | 1.02 ↑      |
| Q9BVG4      | Protein PBDC1 (Polysaccharide biosynthesis domain-containing protein 1)                                                                                         | PBDC1    | 0.02            | 1.06 ↑      |
| Q99497      | Parkinson disease protein 7 (Maillard deglycase) (Oncogene DJ1) (Parkinsonism-associated deglycase) (Protein DJ-1) (DJ-1) (Protein/nucleic acid deglycase DJ-1) | PARK7    | 0.02            | 1.01 ↑      |
| P11940      | Polyadenylate-binding protein 1 (PABP-1) (Poly(A)-binding protein 1)                                                                                            | PABP1    | 0.02            | 1.02 ↑      |
| P27708      | CAD protein [Includes: Glutamine-dependent carbamoyl-phosphate synthase                                                                                         | PYR1     | 0.02            | 1.01 ↑      |
| P05386      | Large ribosomal subunit protein P1 (60S acidic ribosomal protein P1)                                                                                            | RLA1     | 0.02            | 1.02 ↑      |
| P30419      | Glycylpeptide N-tetradecanoyltransferase 1                                                                                                                      | NMT1     | 0.02            | 1.02 ↑      |
| P16989      | Y-box-binding protein 3 (Cold shock domain-containing protein A)                                                                                                | YBOX3    | 0.01            | 1.03 ↑      |
| P36578      | Large ribosomal subunit protein uL4 (60S ribosomal protein L1)                                                                                                  | RL4      | 0.01            | 1.03 ↑      |
| O00299      | Chloride intracellular channel protein 1 (Chloride channel ABP)                                                                                                 | CLIC1    | 0.01            | 1.01 ↑      |
| Q15365      | Poly(rC)-binding protein 1 (Alpha-CP1)                                                                                                                          | PCBP1    | 0.01            | 1.02 ↑      |
| Q99536      | Synaptic vesicle membrane protein VAT-1 homolog                                                                                                                 | VAT1     | 0.01            | 1.01 ↑      |
| P62269      | Small ribosomal subunit protein uS13 (40S ribosomal protein S18) (Ke-3) (Ke3)                                                                                   | RS18     | 0.01            | 1.01 ↑      |
| Q15785      | Mitochondrial import receptor subunit TOM34 (hTom34)                                                                                                            | TOM34    | 0.01            | 1.01 ↑      |
| P33316      | Deoxyuridine 5'-triphosphate nucleotidohydrolase, mitochondrial (dUTPase)                                                                                       | DUT      | 0.01            | 1.02 ↑      |
| P50995      | Annexin A11 (56 kDa autoantigen) (Annexin XI)                                                                                                                   | ANX11    | 0.01            | 1.03 ↑      |
| Q14204      | Cytoplasmic dynein 1 heavy chain 1                                                                                                                              | DYHC1    | 0.01            | 1.01 ↑      |
| P30041      | Peroxiredoxin-6                                                                                                                                                 | PRDX6    | 0.01            | 1.01 ↑      |
| P41567      | Eukaryotic translation initiation factor 1 (eIF1)                                                                                                               | EIF1     | 0.01            | 1.11 ↑      |

| Protein IDs | Protein Names                                                                                                                                                                     | Gene IDs | <i>p</i> -value | Fold Change |
|-------------|-----------------------------------------------------------------------------------------------------------------------------------------------------------------------------------|----------|-----------------|-------------|
| P39019      | Small ribosomal subunit protein eS19 (40S ribosomal protein S19)                                                                                                                  | RS19     | 0.01            | 1.01 ↑      |
| P26038      | Moesin (Membrane-organizing extension spike protein)                                                                                                                              | MOES     | 0.01            | 1.02 ↑      |
| A0A0U1RRL7  | Protein MMP24OS (MMP24 opposite strand)                                                                                                                                           | MMPOS    | 0.01            | 1.04 ↑      |
| Q16186      | Proteasomal ubiquitin receptor ADRM1 (110 kDa cell membrane glycoprotein) (Gp110)                                                                                                 | ADRM1    | 0.01            | 1.04 ↑      |
| P11413      | Glucose-6-phosphate 1-dehydrogenase (G6PD)                                                                                                                                        | G6PD     | 0.01            | 1.02 ↑      |
| Q92530      | Proteasome inhibitor PI31 subunit (hPI31)                                                                                                                                         | PSMF1    | 0.01            | 1.05 ↑      |
| P50914      | Large ribosomal subunit protein eL14 (60S ribosomal protein L14) (CAG-ISL 7)                                                                                                      | RL14     | 0.01            | 1.02 ↑      |
| P08758      | Annexin A5 (Anchorin CII) (Annexin V)                                                                                                                                             | ANXA5    | 0.01            | 1.02 ↑      |
| P21333      | Filamin-A (FLN-A)                                                                                                                                                                 | FLNA     | 0.01            | 1.01 ↑      |
| Q92900      | Regulator of nonsense transcripts 1                                                                                                                                               | RENT1    | 0.009           | 1.02 ↑      |
| Q14011      | Cold-inducible RNA-binding protein (A18 hnRNP) (Glycine-rich RNA-binding protein CIRP)                                                                                            | CIRBP    | 0.009           | 1.02 ↑      |
| O95197      | Reticulon-3 (Homolog of ASY protein) (HAP) (Neuroendocrine-specific protein-like 2) (NSP-like protein 2) (Neuroendocrine-specific protein-like II) (NSP-like protein II) (NSPLII) | RTN3     | 0.008           | 1.04 ↑      |
| O43175      | D-3-phosphoglycerate dehydrogenase (3-PGDH)                                                                                                                                       | SERA     | 0.008           | 1.03 ↑      |
| P56537      | Eukaryotic translation initiation factor 6 (eIF-6)                                                                                                                                | IF6      | 0.008           | 1.02 ↑      |
| P23381      | Tryptophan--tRNA ligase, cytoplasmic (Interferon-induced protein 53) (IFP53)                                                                                                      | SYWC     | 0.007           | 1.04 ↑      |
| O43765      | Small glutamine-rich tetratricopeptide repeat-containing protein alpha (Alpha-SGT)                                                                                                | SGTA     | 0.007           | 1.03 ↑      |
| O14744      | Protein arginine N-methyltransferase 5 (PRMT5)                                                                                                                                    | ANM5     | 0.007           | 1.02 ↑      |
| Q9NTK5      | Obg-like ATPase 1 (DNA damage-regulated overexpressed in cancer 45) (DOC45) (GTP-binding protein 9)                                                                               | OLA1     | 0.007           | 1.03 ↑      |
| P46087      | Probable 28S rRNA (cytosine(4447)-C(5))-methyltransferase                                                                                                                         | NOP2     | 0.007           | 1.03 ↑      |
| P68366      | Tubulin alpha-4A chain                                                                                                                                                            | TBA4A    | 0.007           | 1.04 ↑      |
| Q9UJU6      | Drebrin-like protein (Cervical SH3P7)                                                                                                                                             | DBNL     | 0.006           | 1.04 ↑      |
| Q16658      | Fascin (55 kDa actin-bundling protein) (Singed-like protein) (p55)                                                                                                                | FSCN1    | 0.006           | 1.01 ↑      |
| P62241      | Small ribosomal subunit protein eS8 (40S ribosomal protein S8)                                                                                                                    | RS8      | 0.006           | 1.02 ↑      |
| P50570      | Dynamin-2                                                                                                                                                                         | DYN2     | 0.005           | 1.03 ↑      |
| P11021      | Endoplasmic reticulum chaperone BiP                                                                                                                                               | BIP      | 0.005           | 1.01 ↑      |



| Protein IDs | Protein Names                                                                                                                     | Gene IDs | <i>p</i> -value | Fold Change |
|-------------|-----------------------------------------------------------------------------------------------------------------------------------|----------|-----------------|-------------|
| Q14019      | Coactosin-like protein                                                                                                            | COTL1    | 0.005           | 1.02 ↑      |
| P31150      | Rab GDP dissociation inhibitor alpha (Rab GDI alpha)                                                                              | GDIA     | 0.005           | 1.02 ↑      |
| P10599      | Thioredoxin (Trx) (ATL-derived factor) (ADF)                                                                                      | THIO     | 0.005           | 1.01 ↑      |
| P15311      | Ezrin (Cytovillin) (Villin-2) (p81)                                                                                               | EZRI     | 0.005           | 1.01 ↑      |
| P49591      | Serine--tRNA ligase, cytoplasmic                                                                                                  | SYSC     | 0.005           | 1.04 ↑      |
| P30043      | Flavin reductase (NADPH) (FR)                                                                                                     | BLVRB    | 0.005           | 1.02 ↑      |
| P13639      | Elongation factor 2 (EF-2)                                                                                                        | EF2      | 0.004           | 1.01 ↑      |
| P16949      | Stathmin (Leukemia-associated phosphoprotein p18)                                                                                 | STMN1    | 0.004           | 1.07 ↑      |
| P46781      | Small ribosomal subunit protein uS4 (40S ribosomal protein S9)                                                                    | RS9      | 0.004           | 1.02 ↑      |
| P41250      | Glycine--tRNA ligase (Diadenosine tetraphosphate synthetase) (Ap4A synthetase)                                                    | GARS     | 0.004           | 1.01 ↑      |
| Q9BWF3      | RNA-binding protein 4 (Lark homolog) (hLark) (RNA-binding motif protein 4) (RNA-binding motif protein 4a)                         | RBM4     | 0.004           | 1.02 ↑      |
| P30086      | Phosphatidylethanolamine-binding protein 1 (PEBP-1)                                                                               | PEBP1    | 0.004           | 1.02 ↑      |
| Q07955      | Serine/arginine-rich splicing factor 1 (Alternative-splicing factor 1)                                                            | SRSF1    | 0.004           | 1.02 ↑      |
| P08195      | 4F2 cell-surface antigen heavy chain (4F2hc)                                                                                      | 4F2      | 0.004           | 1.02 ↑      |
| P17655      | Calpain-2 catalytic subunit (Calcium-activated neutral proteinase 2) (CANP 2)                                                     | CAN2     | 0.004           | 1.03 ↑      |
| P14618      | Pyruvate kinase PKM(Cytosolic thyroid hormone-binding protein) (CTHBP)                                                            | KPYM     | 0.003           | 1.01 ↑      |
| Q01081      | Splicing factor U2AF 35 kDa subunit (U2 auxiliary factor 35 kDa subunit)                                                          | U2AF1    | 0.003           | 1.04 ↑      |
| P30085      | UMP-CMP kinase (Deoxycytidylate kinase) (CK) (dCMP kinase)                                                                        | KCY      | 0.003           | 1.01 ↑      |
| P05387      | Large ribosomal subunit protein P2 (60S acidic ribosomal protein P2) (Renal carcinoma antigen NY-REN-44)                          | RLA2     | 0.003           | 1.02 ↑      |
| P62829      | Large ribosomal subunit protein uL14 (60S ribosomal protein L17) (60S ribosomal protein L23)                                      | RL23     | 0.003           | 1.05 ↑      |
| P13489      | Ribonuclease inhibitor (Placental ribonuclease inhibitor) (Placental RNase inhibitor) (Ribonuclease/angiogenin inhibitor 1) (RAI) | RINI     | 0.002           | 1.02 ↑      |
| P04083      | Annexin A1 (Annexin I)                                                                                                            | ANXA1    | 0.002           | 1.02 ↑      |
| P24534      | Elongation factor 1-beta (EF-1-beta)                                                                                              | EF1B     | 0.002           | 1.02 ↑      |

| Protein IDs | Protein Names                                                                                                      | Gene IDs | <i>p</i> -value | Fold Change |
|-------------|--------------------------------------------------------------------------------------------------------------------|----------|-----------------|-------------|
| P42677      | Small ribosomal subunit protein eS27 (40S ribosomal protein S27) (Metallopan-stimulin 1) (MPS-1)                   | RS27     | 0.002           | 1.06 ↑      |
| Q92945      | Far upstream element-binding protein 2 (FUSE-binding protein 2) (KH type-splicing regulatory protein) (KSRP) (p75) | FUBP2    | 0.002           | 1.01 ↑      |
| Q15942      | Zyxin (Zyxin-2)                                                                                                    | ZYX      | 0.001           | 1.10 ↑      |
| P12268      | Inosine-5'-monophosphate dehydrogenase 2 (IMP dehydrogenase 2) (IMPD 2)                                            | IMDH2    | 0.001           | 1.03 ↑      |
| P19105      | Myosin regulatory light chain 12A (Epididymis secretory protein Li 24) (HEL-S-24)                                  | ML12A    | 0.001           | 1.01 ↑      |
| P67809      | Y-box-binding protein 1 (YB-1) (CCAAT-binding transcription factor I subunit A) (CBF-A)                            | YBOX1    | 0.0004          | 1.04 ↑      |
| Q13501      | Sequestosome-1 (EBI3-associated protein of 60 kDa) (EBIAP) (p60)                                                   | SQSTM    | 0.0004          | 1.08 ↑      |
| P62913      | Large ribosomal subunit protein uL5 (60S ribosomal protein L11)                                                    | RL11     | 0.0003          | 1.02 ↑      |
| P54577      | Tyrosine--tRNA ligase, cytoplasmic (TyrRS)                                                                         | SYYC     | 0.0003          | 1.03 ↑      |
| P62266      | Small ribosomal subunit protein uS12 (40S ribosomal protein S23)                                                   | RS23     | 0.0002          | 1.11 ↑      |
| P31946      | 14-3-3 protein beta/alpha (Protein 1054) (Protein kinase C inhibitor protein 1) (KCIP-1)                           | 1433B    | 0.0002          | 1.01 ↑      |
| P40222      | Alpha-taxilin                                                                                                      | TXLNA    | 0.0002          | 1.04 ↑      |
| P63244      | Small ribosomal subunit protein RACK1 (Cell proliferation-inducing gene 21 protein)                                | RACK1    | 0.0001          | 1.01 ↑      |
| Q9H1E3      | Nuclear ubiquitous casein and cyclin-dependent kinase substrate 1 (P1)                                             | NUCKS    | 0.00009         | 1.04 ↑      |
| P24666      | Low molecular weight phosphotyrosine protein phosphatase (LMW-PTP)                                                 | PPAC     | 0.00005         | 1.03 ↑      |
| P51858      | Hepatoma-derived growth factor (HDGF) (High mobility group protein 1-like 2) (HMG-1L2)                             | HDGF     | 0.00005         | 1.02 ↑      |
| Q16543      | Hsp90 co-chaperone Cdc37 (Hsp90 chaperone protein kinase-targeting subunit) (p50Cdc37)                             | CDC37    | 0.00003         | 1.03 ↑      |
| P26641      | Elongation factor 1-gamma (EF-1-gamma)                                                                             | EF1G     | 0.00002         | 1.03 ↑      |
